# Supplementary material
Source: publisher site journal article supplement (https://www.dovepress.com/article/610706)
Supplement: Supplementary file 1 [file 610706%20Supplementary%20File.docx]

# Supplementary File 1

This document consolidates all supplementary materials cited in the manuscript.

Supplementary Table S4 contains the complete differentially expressed gene (DEG) list defined by |log2FC| > 0.5 and Benjamini-Hochberg adjusted P < 0.05 (N = 308). In Supplementary Table S4, NS in the regulation column indicates non-significant genes that did not meet the DEG threshold criteria.

## Supplementary Results

Additional external cohorts (GSE37768, GSE76925 non-normalized, and COPD-only GSE69818) are summarized in Supplementary Table S1. Structured cross-study mechanistic triangulation is summarized in Supplementary Table S2.

## Supplementary Table S1. External Validation Overview

| cohort | role | design | n_case | n_ctrl | ern1_metric | p_value | auc | auc_ci | note |
| --- | --- | --- | --- | --- | --- | --- | --- | --- | --- |
| GSE47460 | Main text - primary external cohort | COPD vs Control (lung tissue, mixed-sex) | 145 | 91 | single probe A_23_P164042 | 0.570859229300703 | 0.477036756347101 | 0.400-0.552 | Sex-adjusted model non-significant |
| GSE38974 | Main text - supplementary external cohort | COPD vs Control (lung tissue) | 23 | 9 | primary_NM001433_probe | 0.78467168446145 | 0.458937198067633 | 0.266-0.662 | Probe-dependent result |
| GSE38974 | Main text - supplementary external cohort | COPD vs Control (lung tissue) | 23 | 9 | mean_of_4_ERN1_probes | 0.131546039067065 | 0.681159420289855 | 0.478-0.870 | Probe-dependent result |
| GSE37768 | Supplementary only | COPD vs SmokerCtrl | 18 | 11 | ERN1_primary | 0.959974651763496 | 0.404040404040404 | 0.187-0.616 | Mostly non-significant |
| GSE37768 | Supplementary only | COPD vs SmokerCtrl | 18 | 11 | ERN1_mean | 0.954698908388788 | 0.51010101010101 | 0.273-0.742 | Mostly non-significant |
| GSE37768 | Supplementary only | COPD vs NonsmokerCtrl | 18 | 9 | ERN1_primary | 0.0673985650866297 | 0.604938271604938 | 0.389-0.809 | Mostly non-significant |
| GSE37768 | Supplementary only | COPD vs NonsmokerCtrl | 18 | 9 | ERN1_mean | 0.0895472558468884 | 0.716049382716049 | 0.481-0.914 | Mostly non-significant |
| GSE76925_non_normalized | Supplementary only | COPD vs Control (lung tissue) | 111 | 40 | single probe ILMN_1731231 (log2) | 0.382220372257087 | 0.426351351351351 | 0.322-0.525 | Low detection rate |
| GSE69818 | Supplementary supportive analysis | COPD-only emphysema YES vs NO | 38 | 32 | 11741334_at | 0.93112578365803 | 0.476151315789474 | 0.341-0.612 | No stratification signal |

## Supplementary Table S2. Literature Triangulation of ERN1/ER-Stress Evidence

| evidence_id | reference_no | study_type | context | model_or_tissue | key_finding | relation_to_ern1 | implication_for_current_study |
| --- | --- | --- | --- | --- | --- | --- | --- |
| L1 | [16] | Mechanistic review | UPR signaling framework | General cellular stress biology | IRE1-centered UPR signaling regulates stress adaptation, inflammatory signaling, and cell-fate decisions. | Directly supports ERN1 (IRE1) as mechanistically central stress sensor. | Supports pathway plausibility despite heterogeneous diagnostic replication. |
| L2 | [10] | COPD-focused review | ER stress in COPD pathogenesis | COPD literature synthesis | ER-stress and UPR activation are repeatedly linked to inflammation and tissue injury in COPD. | Supports relevance of ERN1/IRE1 axis to COPD disease biology. | Justifies context-dependent biomarker framing at mechanism level. |
| L3 | [17] | Experimental study | Airway epithelial inflammation | Airway epithelial cells | ER-stress activation in airway epithelium promotes inflammatory mediator release and aggravates airway inflammation. | Consistent with ERN1-linked ER-stress inflammatory amplification. | Provides cellular-level rationale for ERN1 biological relevance. |
| L4 | [18] | Experimental/mechanistic report | Airway remodeling in COPD | COPD-related airway remodeling context | ER-stress signaling is implicated in airway remodeling processes in COPD. | Compatible with ERN1 pathway involvement in structural disease progression. | Supports mechanistic value even if case-control diagnostic effect is unstable. |
| L5 | Current study (GSE57148) | Discovery cohort analysis | Case-control lung tissue transcriptomics | Male smoking-associated lung tissue | Strong discovery signal for ERN1 with good discrimination in the discovery cohort. | Direct statistical support in discovery dataset. | Hypothesis-generating signal requiring cross-cohort confirmation. |
| L6 | Current study (GSE47460/GSE38974) | External validation | Independent cohort replication | Mixed external lung-tissue cohorts | Replication is heterogeneous (negative in primary cohort; partial probe-dependent support in supplementary cohort). | Indicates context dependence and platform/cohort sensitivity. | Supports conservative claims and motivates harmonized future validation. |

## Supplementary Table S3. Software and Package Versions

| Component | Version | Role in analysis |
| --- | --- | --- |
| R | 4.5.3 | Primary statistical environment |
| Python | 3.14.3 | Data parsing, PPI topology, and reporting utilities |
| limma | 3.66.0 | Differential expression modeling |
| GEOquery | 2.78.0 | GEO data parsing and import |
| ggplot2 | 4.0.2 | Plot generation in R |

## Supplementary Table S4. Complete Differentially Expressed Gene (DEG) List in GSE57148

| Gene | log2FC | padj | logFC | P.Value | adj.P.Val | AveExpr | t | B | regulation |
| --- | --- | --- | --- | --- | --- | --- | --- | --- | --- |
| COX6A1 | -0.5176769277915758 | 1.9437476685067558e-21 | -0.5176769277915758 | 1.1612089542426405e-25 | 1.9437476685067558e-21 | 7.80952767913493 | -12.199199661512639 | 47.547235612005906 | NS |
| LSM7 | -0.7243942438051727 | 9.939772366492617e-20 | -0.7243942438051727 | 1.7814276300542355e-23 | 9.939772366492617e-20 | 5.623291015411182 | -11.465773951988597 | 42.629302658845575 | NS |
| STRA13 | -0.7158592516906523 | 1.7934468503180115e-19 | -0.7158592516906523 | 4.2856726215855465e-23 | 1.7934468503180115e-19 | 4.403382357218287 | -11.337130704895568 | 41.77142275022491 | NS |
| STX8 | -0.6465962020914269 | 2.8001787769251584e-18 | -0.6465962020914269 | 8.832264790587869e-22 | 2.8001787769251584e-18 | 4.832528173209495 | -10.891606911890664 | 38.814494687524856 | NS |
| RAD54L2 | 0.5988728776590098 | 2.8001787769251584e-18 | 0.5988728776590098 | 1.0037082658194008e-21 | 2.8001787769251584e-18 | 2.2756319661340823 | 10.872696801219377 | 38.689526929404636 | NS |
| STAT3 | 0.5257647263311673 | 3.882326961338696e-18 | 0.5257647263311673 | 1.855464226698702e-21 | 3.882326961338696e-18 | 5.951890670056839 | 10.781733596313405 | 38.08906582018688 | NS |
| CCDC56 | -0.6131414728943598 | 5.256037097715495e-18 | -0.6131414728943598 | 3.1399946817106725e-21 | 5.256037097715495e-18 | 5.120712381182537 | -10.703712456087013 | 37.57494852909629 | NS |
| ATP5G1 | -0.5108716917359235 | 5.32112166126188e-18 | -0.5108716917359235 | 3.49676433920071e-21 | 5.32112166126188e-18 | 5.672798590430806 | -10.687736245490232 | 37.469780737828955 | NS |
| RNF181 | -0.5038638719000881 | 1.258783516096087e-17 | -0.5038638719000881 | 9.986184262407663e-21 | 1.258783516096087e-17 | 5.5151893389554125 | -10.53165477156895 | 36.44431613452159 | NS |
| TRAPPC6A | -0.6046017683157472 | 2.3148473960317132e-17 | -0.6046017683157472 | 2.0743599343136206e-20 | 2.3148473960317132e-17 | 4.096542744563536 | -10.422585915390714 | 35.729955358987525 | NS |
| GTF3C3 | 0.537241039836232 | 2.922821173046753e-17 | 0.537241039836232 | 2.968394763235247e-20 | 2.922821173046753e-17 | 3.32839189429294 | 10.369012179032902 | 35.37976998240731 | NS |
| NHSL2 | 0.6474774430148361 | 4.873582325534086e-17 | 0.6474774430148361 | 5.240724168684721e-20 | 4.873582325534086e-17 | 1.1742488813369714 | 10.283885748316663 | 34.82432614335561 | NS |
| SEC61B | -0.5187683595412942 | 5.819836606279761e-17 | -0.5187683595412942 | 6.953625194192916e-20 | 5.819836606279761e-17 | 7.066388301124188 | -10.241464641639213 | 34.547994795781705 | NS |
| COX8A | -0.5535841169703328 | 1.5476559829593714e-16 | -0.5535841169703328 | 2.19952155187376e-19 | 1.5476559829593714e-16 | 7.526088526877205 | -10.06822520967735 | 33.4228442019743 | NS |
| APRT | -0.5714160386814227 | 1.7378283813711717e-16 | -0.5714160386814227 | 2.688722785857192e-19 | 1.7378283813711717e-16 | 4.903951711399466 | -10.037927282586626 | 33.22663423858674 | NS |
| HMBOX1 | 0.9147100411051945 | 2.05346576709962e-16 | 0.9147100411051945 | 3.3122394236029475e-19 | 2.05346576709962e-16 | 1.916628809430522 | 10.006434905099322 | 33.02287381027162 | NS |
| C14orf49 | 0.6100591690614339 | 4.4043357776585035e-16 | 0.6100591690614339 | 8.419782835597832e-19 | 4.4043357776585035e-16 | 1.986754409440414 | 9.865197697093043 | 32.11142564621012 | NS |
| KIAA0889 | 0.5242992441643386 | 5.221382674418013e-16 | 0.5242992441643386 | 1.0605592384862442e-18 | 5.221382674418013e-16 | 2.2473945636201416 | 9.830164481124921 | 31.88596307109943 | NS |
| NDUFB7 | -0.6052289688208896 | 5.525690539711633e-16 | -0.6052289688208896 | 1.155380661269533e-18 | 5.525690539711633e-16 | 6.090496402500319 | -9.81715627183305 | 31.802310392675967 | NS |
| POLD4 | -0.6034586696848594 | 5.99643089330062e-16 | -0.6034586696848594 | 1.3612782958684722e-18 | 5.99643089330062e-16 | 5.350160151278926 | -9.792229771747522 | 31.642111741815594 | NS |
| TRAPPC2L | -0.5664008994728409 | 6.06195145410906e-16 | -0.5664008994728409 | 1.4123669676220402e-18 | 6.06195145410906e-16 | 4.9159691502632725 | -9.786627105526051 | 31.606122064274192 | NS |
| NUDT3 | 0.5339692803956848 | 9.090417024517106e-16 | 0.5339692803956848 | 2.4438064765115586e-18 | 9.090417024517106e-16 | 3.76786824336544 | 9.70312985695827 | 31.070546845767847 | NS |
| IFI27L2 | -0.7022225282932713 | 1.859156412487027e-15 | -0.7022225282932713 | 5.775502326860949e-18 | 1.859156412487027e-15 | 6.017077680429355 | -9.571688178738125 | 30.23049750643113 | NS |
| ERN1 | 0.7508362884863677 | 1.978315782811691e-15 | 0.7508362884863677 | 6.263859041102791e-18 | 1.978315782811691e-15 | 2.513998657819848 | 9.559252716362192 | 30.151220666421597 | NS |
| KRTCAP2 | -0.5102092401821894 | 2.228665496322223e-15 | -0.5102092401821894 | 7.18967302714619e-18 | 2.228665496322223e-15 | 6.496390733125241 | -9.538121890266623 | 30.01659065006402 | NS |
| NDUFAB1 | -0.5001262321926143 | 3.4334605620531295e-15 | -0.5001262321926143 | 1.210192802205237e-17 | 3.4334605620531295e-15 | 5.947167523815473 | -9.458159486623945 | 29.50805653501641 | NS |
| TMEM134 | -0.5440191144171145 | 4.26231520420802e-15 | -0.5440191144171145 | 1.527802809322428e-17 | 4.26231520420802e-15 | 4.050051899970592 | -9.42229778877451 | 29.280472102130812 | NS |
| PRKAR2A | 0.7524195751252116 | 4.421503374693248e-15 | 0.7524195751252116 | 1.6360458741938932e-17 | 4.421503374693248e-15 | 3.0803918192184985 | 9.41175564225334 | 29.213627665226436 | NS |
| NBPF10 | 0.6113315537211386 | 4.421503374693248e-15 | 0.6113315537211386 | 1.664106055353812e-17 | 4.421503374693248e-15 | 3.7049913087592845 | 9.409135973829938 | 29.19702126892523 | NS |
| FASTK | -0.6133943870809415 | 4.428597006083113e-15 | -0.6133943870809415 | 1.6932326207618092e-17 | 4.428597006083113e-15 | 3.8216875421874708 | -9.40646280544834 | 29.18007741432832 | NS |
| NDUFA7 | -0.6065433931212123 | 4.624550857651978e-15 | -0.6065433931212123 | 1.8510359487584833e-17 | 4.624550857651978e-15 | 4.691178653001816 | -9.392730974547888 | 29.09306519962949 | NS |
| MRPS24 | -0.5590033528601328 | 5.1321177156631274e-15 | -0.5590033528601328 | 2.1443323807354628e-17 | 5.1321177156631274e-15 | 4.967187381192906 | -9.370049337453098 | 28.949441201983216 | NS |
| RASSF7 | -0.87105965540003 | 5.74979866583093e-15 | -0.87105965540003 | 2.473179424934745e-17 | 5.74979866583093e-15 | 4.508662909116548 | -9.348029009222762 | 28.81012344980496 | NS |
| FAM127B | -0.5246009625622747 | 8.0706873500845e-15 | -0.5246009625622747 | 3.76075998151975e-17 | 8.0706873500845e-15 | 4.611279975682149 | -9.283238097187189 | 28.40089233961555 | NS |
| KLF7 | 0.7210031027523165 | 8.495076651782931e-15 | 0.7210031027523165 | 4.00926611799302e-17 | 8.495076651782931e-15 | 2.9637534429495087 | 9.273332334172693 | 28.338417050747562 | NS |
| HIPK2 | 0.5979865039785444 | 9.06875626017039e-15 | 0.5979865039785444 | 4.349758300270196e-17 | 9.06875626017039e-15 | 3.2620215455445436 | 9.26070810940581 | 28.258831954024526 | NS |
| DDI2 | 0.7331734731669064 | 1.2139075712046329e-14 | 0.7331734731669064 | 6.033790863299905e-17 | 1.2139075712046329e-14 | 1.6233707138804296 | 9.209962123537853 | 27.93932509931364 | NS |
| C10orf125 | -0.7462680506649977 | 1.2845789652444419e-14 | -0.7462680506649977 | 6.52304271735334e-17 | 1.2845789652444419e-14 | 4.167015704420708 | -9.197857530002588 | 27.8632084799339 | NS |
| NME3 | -0.7018054052140918 | 1.5676613844675193e-14 | -0.7018054052140918 | 8.054177613011928e-17 | 1.5676613844675193e-14 | 4.042300834065734 | -9.165092836283446 | 27.65736418997953 | NS |
| DOCK5 | 0.5816007256490723 | 2.309235443641295e-14 | 0.5816007256490723 | 1.3105763017260472e-16 | 2.309235443641295e-14 | 2.271051580093701 | 9.089273218886326 | 27.18209398853156 | NS |
| EIF2C2 | 0.6455996875019745 | 2.830279661894615e-14 | 0.6455996875019745 | 1.6818119031288387e-16 | 2.830279661894615e-14 | 1.9088765241154952 | 9.050342156290377 | 26.938645219169832 | NS |
| DDT | -0.5755628161546014 | 2.8323793572641216e-14 | -0.5755628161546014 | 1.709004809628271e-16 | 2.8323793572641216e-14 | 5.777862265913609 | -9.0478363143488 | 26.92298919945335 | NS |
| SPSB3 | -0.7152738610577809 | 3.115879823881977e-14 | -0.7152738610577809 | 1.9359071729716567e-16 | 3.115879823881977e-14 | 4.288903255147789 | -9.028351085870371 | 26.80130669335868 | NS |
| TMEM219 | -0.5112936256038649 | 3.876722014220767e-14 | -0.5112936256038649 | 2.570739850519775e-16 | 3.876722014220767e-14 | 5.627582376291236 | -8.983962025343242 | 26.52448612978331 | NS |
| C19orf70 | -0.6670420438581819 | 3.9805347043229793e-14 | -0.6670420438581819 | 2.6633603374405503e-16 | 3.9805347043229793e-14 | 3.623355453036107 | -8.978416522184592 | 26.48994073779451 | NS |
| ZNF121 | 0.5065842623218 | 4.112548173532051e-14 | 0.5065842623218 | 2.776258698901498e-16 | 4.112548173532051e-14 | 2.2816235740372455 | 8.971910383052007 | 26.449421846248757 | NS |
| ANAPC11 | -0.5226664887289729 | 5.418610657001908e-14 | -0.5226664887289729 | 3.884540766116428e-16 | 5.418610657001908e-14 | 4.991118512318088 | -8.919202811935135 | 26.121599799596193 | NS |
| RPLP2 | -0.5882135537989317 | 5.864771094347752e-14 | -0.5882135537989317 | 4.3094978469727785e-16 | 5.864771094347752e-14 | 10.3807898637515 | -8.902888206743508 | 26.020285138509568 | NS |
| KIAA0754 | 0.7676298367132933 | 5.974454909387071e-14 | 0.7676298367132933 | 4.532862019787073e-16 | 5.974454909387071e-14 | 1.2613072901698952 | 8.894942968436611 | 25.970971702446047 | NS |
| ASXL2 | 0.6461692237588357 | 7.252084448213239e-14 | 0.6461692237588357 | 5.588857720410465e-16 | 7.252084448213239e-14 | 2.31426579613198 | 8.861985816643642 | 25.766607354491104 | NS |
| SFT2D2 | 0.5616856643172063 | 9.329741358998903e-14 | 0.5616856643172063 | 7.504501212126512e-16 | 9.329741358998903e-14 | 3.275440050496186 | 8.815522111538316 | 25.479013898612006 | NS |
| FAM168A | 0.6331996022585278 | 1.1139393535374437e-13 | 0.6331996022585278 | 9.2501087365855e-16 | 1.1139393535374437e-13 | 3.2163455908250063 | 8.78249370462936 | 25.27495698360899 | NS |
| RUNDC2A | 0.5519413917485663 | 1.2098530896254403e-13 | 0.5519413917485663 | 1.0552515149370588e-15 | 1.2098530896254403e-13 | 1.7871789769992554 | 8.761664240070848 | 25.146430549732273 | NS |
| NUDT4 | 0.6048363594541337 | 1.3565789591448283e-13 | 0.6048363594541337 | 1.2399580664864014e-15 | 1.3565789591448283e-13 | 3.0139970617980287 | 8.73613207076104 | 24.989059486109728 | NS |
| ERC1 | 0.5049438475403583 | 1.7972768135671123e-13 | 0.5049438475403583 | 1.7716152353101948e-15 | 1.7972768135671123e-13 | 2.8192168555204846 | 8.679543995936669 | 24.640957191775975 | NS |
| TRIM44 | 0.5967300370209987 | 1.883130404884199e-13 | 0.5967300370209987 | 1.8674929638017626e-15 | 1.883130404884199e-13 | 4.18090209905157 | 8.671172641061732 | 24.589541701388338 | NS |
| NUBP2 | -0.5204901148982346 | 2.030796353796426e-13 | -0.5204901148982346 | 2.038196949864386e-15 | 2.030796353796426e-13 | 3.7644002917935717 | -8.657272371738713 | 24.5042149997056 | NS |
| HRAS | -0.6166866656583325 | 2.333128071766143e-13 | -0.6166866656583325 | 2.4391983544959378e-15 | 2.333128071766143e-13 | 3.684327407846384 | -8.628701491881765 | 24.329015932986884 | NS |
| MGAT5 | 0.770893517304307 | 3.1396919536677627e-13 | 0.770893517304307 | 3.4137280337387703e-15 | 3.1396919536677627e-13 | 2.5767433369434065 | 8.575124634586773 | 24.00114830930984 | NS |
| ETFB | -0.5829330300006124 | 3.3326911798765335e-13 | -0.5829330300006124 | 3.703211419182957e-15 | 3.3326911798765335e-13 | 5.202823491428728 | -8.562130027743994 | 23.921759779907923 | NS |
| UBXN7 | 0.7477592504140584 | 3.7578548274447603e-13 | 0.7477592504140584 | 4.198093391075752e-15 | 3.7578548274447603e-13 | 1.9809189450819213 | 8.542089206791816 | 23.799426098252308 | NS |
| IGF2R | 0.5217401904719319 | 5.181510460614829e-13 | 0.5217401904719319 | 5.9742608214269784e-15 | 5.181510460614829e-13 | 4.621005688049954 | 8.485608577173531 | 23.45533113542331 | NS |
| PTPRCAP | -0.8228002613484318 | 6.653911048237849e-13 | -0.8228002613484318 | 8.069442277270347e-15 | 6.653911048237849e-13 | 4.02149548397403 | -8.437358721810435 | 23.162179439718916 | NS |
| ZC3H13 | 0.5304876709589998 | 7.990830619814667e-13 | 0.5304876709589998 | 1.0025883371331883e-14 | 7.990830619814667e-13 | 3.5685489949013447 | 8.402442979462494 | 22.95050716094878 | NS |
| IFT43 | -0.5208080780991144 | 9.689672957057425e-13 | -0.5208080780991144 | 1.3082418832038818e-14 | 9.689672957057425e-13 | 4.736921893555233 | -8.35955815248513 | 22.69106431442522 | NS |
| MRPL14 | -0.5207388622467555 | 1.001222599728941e-12 | -0.5207388622467555 | 1.369735201254122e-14 | 1.001222599728941e-12 | 5.784114974413559 | -8.352145812069466 | 22.646282377088387 | NS |
| RNF24 | 0.5258603092545864 | 1.0238938175755574e-12 | 0.5258603092545864 | 1.4129844785229329e-14 | 1.0238938175755574e-12 | 2.1785621758940037 | 8.347127664328474 | 22.6159752931835 | NS |
| C6orf1 | -0.5344678239625837 | 1.0659504812037647e-12 | -0.5344678239625837 | 1.502863453994196e-14 | 1.0659504812037647e-12 | 3.693694414488011 | -8.337169016484994 | 22.55585462985888 | NS |
| FUT11 | 0.5120380979266406 | 1.1608191179983735e-12 | 0.5120380979266406 | 1.664356223905906e-14 | 1.1608191179983735e-12 | 3.2469178937077485 | 8.320675118884283 | 22.45635249308687 | NS |
| ZKSCAN1 | 0.5945752208732493 | 1.2115658357288313e-12 | 0.5945752208732493 | 1.7588296677346677e-14 | 1.2115658357288313e-12 | 2.61264652210917 | 8.311747151638999 | 22.40253066166507 | NS |
| CDKL5 | 0.7473086754658281 | 1.2383265534365882e-12 | 0.7473086754658281 | 1.80507604419934e-14 | 1.2383265534365882e-12 | 1.1257504564688274 | 8.307548693191261 | 22.377229604820496 | NS |
| CDK3 | -0.8380587581481174 | 1.3627913736562322e-12 | -0.8380587581481174 | 2.0353536257485992e-14 | 1.3627913736562322e-12 | 1.7685055125205664 | -8.288113905003398 | 22.26018677507737 | NS |
| MICAL2 | 0.7133922791653196 | 1.7965337264715743e-12 | 0.7133922791653196 | 2.73681880787533e-14 | 1.7965337264715743e-12 | 3.3283163757505174 | 8.240094317620713 | 21.97153978107416 | NS |
| C9orf142 | -0.6926556363154193 | 1.9632993438994177e-12 | -0.6926556363154193 | 3.0377832013259406e-14 | 1.9632993438994177e-12 | 3.7420826722952762 | -8.223146256163696 | 21.86985058225227 | NS |
| FDX1L | -0.5055086137811733 | 2.364110116002612e-12 | -0.5055086137811733 | 3.77093853260468e-14 | 2.364110116002612e-12 | 3.3593836453607695 | -8.187976558005337 | 21.659143193189774 | NS |
| ETV3 | 0.6827320307177067 | 2.383775420021839e-12 | 0.6827320307177067 | 3.8165470611497273e-14 | 2.383775420021839e-12 | 3.617429523288828 | 8.186018851969303 | 21.64742671081457 | NS |
| C17orf56 | -0.5743058026498864 | 2.5017491607864334e-12 | -0.5743058026498864 | 4.080157242933845e-14 | 2.5017491607864334e-12 | 2.975931432016098 | -8.175138933428428 | 21.582336590003656 | NS |
| EXOC6B | 0.6367364177072106 | 2.553491341936603e-12 | 0.6367364177072106 | 4.225563663996887e-14 | 2.553491341936603e-12 | 2.363163616249459 | 8.169432066122441 | 21.548211042925775 | NS |
| PDZD8 | 0.533548190178903 | 2.955288901630501e-12 | 0.533548190178903 | 4.9963961954802065e-14 | 2.955288901630501e-12 | 2.414917500254487 | 8.142098450805639 | 21.384919575291224 | NS |
| HIPK3 | 0.767285215312433 | 3.3963298669071564e-12 | 0.767285215312433 | 5.904366994862193e-14 | 3.3963298669071564e-12 | 3.4186651036881206 | 8.114819272907035 | 21.222212502233745 | NS |
| MOBKL1B | 0.6198309572952843 | 4.4649641899202844e-12 | 0.6198309572952843 | 8.02887998784877e-14 | 4.4649641899202844e-12 | 5.346440795551743 | 8.064496020403134 | 20.922744462157436 | NS |
| DDX3X | 0.5118093677602289 | 4.5773516717097985e-12 | 0.5118093677602289 | 8.337651798019369e-14 | 4.5773516717097985e-12 | 6.138367653645432 | 8.05830739609883 | 20.885978522297865 | NS |
| RCAN3 | 0.5169323181496028 | 4.911494407138705e-12 | 0.5169323181496028 | 9.095903376623446e-14 | 4.911494407138705e-12 | 2.744564517782522 | 8.044024428194673 | 20.80117702308674 | NS |
| TMEM110-MUSTN1 | 0.8731073288288106 | 5.4213543093684325e-12 | 0.8731073288288106 | 1.0234470170024641e-13 | 5.4213543093684325e-12 | 1.0878702008534824 | 8.024653076528688 | 20.686280994708042 | NS |
| CEMP1 | -0.5454284674454426 | 8.251174519735124e-12 | -0.5454284674454426 | 1.6365314179772157e-13 | 8.251174519735124e-12 | 2.5241808510915815 | -7.9473352873806125 | 20.229039530146252 | NS |
| MIF | -0.6333239362287353 | 8.749359457597976e-12 | -0.6333239362287353 | 1.7457948854995663e-13 | 8.749359457597976e-12 | 6.3852490923523915 | -7.936661890005465 | 20.16609025020736 | NS |
| JOSD2 | -0.6306324828188972 | 9.080651545280003e-12 | -0.6306324828188972 | 1.833598316688357e-13 | 9.080651545280003e-12 | 3.882503958958083 | -7.928553690722659 | 20.118297884629527 | NS |
| HIGD2A | -0.501449308953271 | 9.252825467193976e-12 | -0.501449308953271 | 1.8777471949835409e-13 | 9.252825467193976e-12 | 5.665394674347118 | -7.924620905564833 | 20.09512547945625 | NS |
| ATP5I | -0.5510175056212159 | 9.33091137548748e-12 | -0.5510175056212159 | 1.906429111904366e-13 | 9.33091137548748e-12 | 7.397251288811422 | -7.922114679422173 | 20.08036148992137 | NS |
| MRPL55 | -0.6238509168208064 | 9.531940204566779e-12 | -0.6238509168208064 | 1.9619477560430517e-13 | 9.531940204566779e-12 | 3.8007428149990674 | -7.9173677870125045 | 20.05240425123925 | NS |
| DPM3 | -0.7036612436888783 | 9.723319558635276e-12 | -0.7036612436888783 | 2.027264786405228e-13 | 9.723319558635276e-12 | 5.880405156944566 | -7.911950523304176 | 20.02050896381889 | NS |
| C6orf226 | -0.6409961208467849 | 9.804859861159447e-12 | -0.6409961208467849 | 2.056600859153702e-13 | 9.804859861159447e-12 | 3.323621266406816 | -7.909573455443987 | 20.006516896331505 | NS |
| RPL27 | -0.5065005478788187 | 9.92785904353566e-12 | -0.5065005478788187 | 2.1054961230988462e-13 | 9.92785904353566e-12 | 10.432656124849279 | -7.905685153454211 | 19.98363379934711 | NS |
| COMTD1 | -0.6614132882284434 | 1.062515064263393e-11 | -0.6614132882284434 | 2.291462681158282e-13 | 1.062515064263393e-11 | 2.602476551500951 | -7.891671179420483 | 19.901206454767554 | NS |
| MPZL3 | 0.6108149947171095 | 1.1045321731610482e-11 | 0.6108149947171095 | 2.38867702183105e-13 | 1.1045321731610482e-11 | 2.581471910634083 | 7.88478738493564 | 19.860744082776833 | NS |
| REL | 0.8083000388947392 | 1.2158693996791385e-11 | 0.8083000388947392 | 2.680302338739483e-13 | 1.2158693996791385e-11 | 2.2903491704735863 | 7.8656879392417025 | 19.748571575113306 | NS |
| FEM1B | 0.54215139524318 | 1.7458476903987007e-11 | 0.54215139524318 | 4.0989195431428963e-13 | 1.7458476903987007e-11 | 2.91652424938659 | 7.795059743033768 | 19.334957066902746 | NS |
| HCST | -0.6935384611660407 | 1.7558919812577474e-11 | -0.6935384611660407 | 4.1329914607536437e-13 | 1.7558919812577474e-11 | 5.093989016622434 | -7.7936803250342175 | 19.32689768743842 | NS |
| AURKAIP1 | -0.5351611312711437 | 1.78975479860119e-11 | -0.5351611312711437 | 4.223389362850051e-13 | 1.78975479860119e-11 | 4.804981790696989 | -7.790074355501229 | 19.30583289555241 | NS |
| RAB24 | -0.5369207994548875 | 1.9240338564199728e-11 | -0.5369207994548875 | 4.574738484109858e-13 | 1.9240338564199728e-11 | 3.9218083876701906 | -7.776749140578048 | 19.22803477031633 | NS |
| MRPL41 | -0.6358590211795168 | 2.154890081524118e-11 | -0.6358590211795168 | 5.175134791640452e-13 | 2.154890081524118e-11 | 5.413847899711012 | -7.756164412183317 | 19.10798618840249 | NS |
| ATF7IP | 0.5634148545803805 | 2.163087873630362e-11 | 0.5634148545803805 | 5.207744865720986e-13 | 2.163087873630362e-11 | 2.8154690150418884 | 7.7551151422138656 | 19.101871282273983 | NS |
| SIK2 | 0.5503840449838115 | 2.2077175591572158e-11 | 0.5503840449838115 | 5.341571249529078e-13 | 2.2077175591572158e-11 | 3.4660564325493604 | 7.7508761264742 | 19.077171577277593 | NS |
| PTPLB | 0.767053284560578 | 2.264238592738312e-11 | 0.767053284560578 | 5.518904031526562e-13 | 2.264238592738312e-11 | 3.8240725391059494 | 7.745418094480965 | 19.045379153707636 | NS |
| EGFR | 0.6632708446517759 | 2.4195888426761693e-11 | 0.6632708446517759 | 5.969832080920353e-13 | 2.4195888426761693e-11 | 3.0934189978610256 | 7.732284881427068 | 18.968926761191536 | NS |
| GDPD3 | -0.6013422512612565 | 2.865560532889415e-11 | -0.6013422512612565 | 7.224246041456079e-13 | 2.865560532889415e-11 | 2.4558303551108436 | -7.700346636078437 | 18.783283458254946 | NS |
| TP53I13 | -0.5369626438853454 | 4.503914710878481e-11 | -0.5369626438853454 | 1.2134927621758735e-12 | 4.503914710878481e-11 | 3.689182115625244 | -7.613161282082238 | 18.278546510444922 | NS |
| C16orf79 | -0.5785107257882465 | 4.783009124130646e-11 | -0.5785107257882465 | 1.3077333851846173e-12 | 4.783009124130646e-11 | 1.7352871199137407 | -7.600547389848362 | 18.205770894467655 | NS |
| C19orf71 | -0.5368490417674305 | 5.515700122720504e-11 | -0.5368490417674305 | 1.532230454068364e-12 | 5.515700122720504e-11 | 2.1934776569374725 | -7.5737932356147395 | 18.05162399707369 | NS |
| ATL3 | 0.5544676906862818 | 7.29767752807296e-11 | 0.5544676906862818 | 2.1580443135170053e-12 | 7.29767752807296e-11 | 2.8681314676663017 | 7.5157944209812175 | 17.718448808160552 | NS |
| TNFRSF14 | -0.5240832214593745 | 8.089884824924525e-11 | -0.5240832214593745 | 2.430976800846548e-12 | 8.089884824924525e-11 | 4.649237538555456 | -7.495572960563789 | 17.602607922820635 | NS |
| ZBED3 | 0.6489884283200804 | 8.611792101293477e-11 | 0.6489884283200804 | 2.613531505739343e-12 | 8.611792101293477e-11 | 2.275264410303427 | 7.483264321199008 | 17.53217852838494 | NS |
| C17orf90 | -0.6405522209026744 | 9.13325931215022e-11 | -0.6405522209026744 | 2.7881567050055334e-12 | 9.13325931215022e-11 | 3.0301190015828476 | -7.472261055204628 | 17.469271137024272 | NS |
| EIF4EBP3 | -0.5087464890154525 | 1.0537550409523956e-10 | -0.5087464890154525 | 3.3175751632828276e-12 | 1.0537550409523956e-10 | 3.909648409228335 | -7.4426432137051455 | 17.300189652733227 | NS |
| ZNF524 | -0.5182530023059475 | 1.1180013043006006e-10 | -0.5182530023059475 | 3.5555300796535807e-12 | 1.1180013043006006e-10 | 2.7060649124940848 | -7.4308253706630625 | 17.232825791487294 | NS |
| GANC | 0.5139593104379419 | 1.1180013043006006e-10 | 0.5139593104379419 | 3.5599181264843786e-12 | 1.1180013043006006e-10 | 3.1965665945886705 | 7.430614860283045 | 17.23162637051599 | NS |
| EPOR | -0.5357203796988865 | 1.2486010418280573e-10 | -0.5357203796988865 | 4.042904383002611e-12 | 1.2486010418280573e-10 | 3.147812682930907 | -7.408883752273407 | 17.107908880293493 | NS |
| MYO9A | 0.5453950868311408 | 1.389473124396851e-10 | 0.5453950868311408 | 4.565447269360584e-12 | 1.389473124396851e-10 | 1.617067959553501 | 7.388090633778405 | 16.989716469456358 | NS |
| C22orf36 | -0.5089844368341279 | 1.6199087743714141e-10 | -0.5089844368341279 | 5.496793021345141e-12 | 1.6199087743714141e-10 | 2.06265885155137 | -7.35627427185111 | 16.809217932206018 | NS |
| NCOA2 | 0.5829019125749977 | 1.788677313385169e-10 | 0.5829019125749977 | 6.144270596788769e-12 | 1.788677313385169e-10 | 2.2176146909539174 | 7.33715567544471 | 16.700961649376804 | NS |
| ALG11 | 0.5193819363128904 | 1.8759412161058044e-10 | 0.5193819363128904 | 6.4868145679643665e-12 | 1.8759412161058044e-10 | 2.5396755680375844 | 7.327831740471776 | 16.64822261290876 | NS |
| NFATC2 | 0.6700142511694045 | 1.9521545837216247e-10 | 0.6700142511694045 | 6.822453142225643e-12 | 1.9521545837216247e-10 | 1.8970970094817912 | 7.3191559842882 | 16.599183178935064 | NS |
| NBPF24 | 0.5253348193815273 | 1.98328646026697e-10 | 0.5253348193815273 | 6.9667987253538344e-12 | 1.98328646026697e-10 | 0.9790974954783819 | 7.315553783388935 | 16.578831302041195 | NS |
| LIME1 | -0.6178664498520732 | 2.060899082437717e-10 | -0.6178664498520732 | 7.2763687061395e-12 | 2.060899082437717e-10 | 2.303478385182697 | -7.308070652005008 | 16.536570517758243 | NS |
| DUSP23 | -0.5704159195465373 | 2.066969536565025e-10 | -0.5704159195465373 | 7.310149743990052e-12 | 2.066969536565025e-10 | 4.3322060626107115 | -7.307273181652918 | 16.532068239467428 | NS |
| RNF208 | -0.5038592673090021 | 2.0968003418173577e-10 | -0.5038592673090021 | 7.503335950466559e-12 | 2.0968003418173577e-10 | 1.4845287600334198 | -7.302781397701705 | 16.506714068255075 | NS |
| LCAT | -0.5754974090004388 | 2.1567675801964148e-10 | -0.5754974090004388 | 7.78235031028517e-12 | 2.1567675801964148e-10 | 3.685833769811746 | -7.296491631035701 | 16.471225615010308 | NS |
| UGCG | 0.6881177606441184 | 2.1752297737996898e-10 | 0.6881177606441184 | 7.887953119639236e-12 | 2.1752297737996898e-10 | 4.099465712864659 | 7.294168975867524 | 16.45812490390199 | NS |
| PCSK5 | 0.5057930243275053 | 2.406036723474917e-10 | 0.5057930243275053 | 8.86865797469397e-12 | 2.406036723474917e-10 | 2.1602996904780944 | 7.273958147690555 | 16.344225722737814 | NS |
| ITGA9 | 0.6013189677464998 | 2.789361849826176e-10 | 0.6013189677464998 | 1.0614872443630289e-11 | 2.789361849826176e-10 | 2.40690195871052 | 7.2429021956104265 | 16.16955242673414 | NS |
| FOSL2 | 1.0392619356102166 | 3.1187725345006804e-10 | 1.0392619356102166 | 1.2092020878731953e-11 | 3.1187725345006804e-10 | 5.395791666265493 | 7.220345039473315 | 16.042943262144263 | Up |
| C2orf54 | -0.6085479255478301 | 3.1633255807393963e-10 | -0.6085479255478301 | 1.2321454559066171e-11 | 3.1633255807393963e-10 | 2.885110188529663 | -7.217087729279473 | 16.024678939072977 | NS |
| SLFN5 | 0.6563535631869799 | 3.3333212759631964e-10 | 0.6563535631869799 | 1.304334449940793e-11 | 3.3333212759631964e-10 | 3.4847847830334797 | 7.207216137169031 | 15.969355524973697 | NS |
| C19orf60 | -0.5956108683198935 | 3.5746834387076025e-10 | -0.5956108683198935 | 1.4158642211978856e-11 | 3.5746834387076025e-10 | 4.197613576459436 | -7.1929779845727015 | 15.88963588821223 | NS |
| SAP25 | -0.7412215617096596 | 3.654279049561874e-10 | -0.7412215617096596 | 1.456122902238945e-11 | 3.654279049561874e-10 | 2.6884822977435086 | -7.188109037189538 | 15.862395032614515 | NS |
| TBC1D10C | -0.5656471519074984 | 3.6873675002935975e-10 | -0.5656471519074984 | 1.4737714946970674e-11 | 3.6873675002935975e-10 | 3.385712911786493 | -7.186016341911908 | 15.850690000105306 | NS |
| CNTN1 | 0.5472210608520109 | 4.691940452465321e-10 | 0.5472210608520109 | 1.9312664864977634e-11 | 4.691940452465321e-10 | 1.5532069649971068 | 7.138968135891692 | 15.588047460701922 | NS |
| MCL1 | 0.5907107707415884 | 4.69983490235864e-10 | 0.5907107707415884 | 1.9373236648709375e-11 | 4.69983490235864e-10 | 7.797319242643487 | 7.138422197325709 | 15.585005573807717 | NS |
| PLA2G4B | -0.9122266471358171 | 5.026237372303508e-10 | -0.9122266471358171 | 2.0928893294076976e-11 | 5.026237372303508e-10 | 2.2164760713801477 | -7.124949370519018 | 15.509979146964518 | NS |
| B3GAT3 | -0.562225349017003 | 5.355494605738465e-10 | -0.562225349017003 | 2.2523855680983806e-11 | 5.355494605738465e-10 | 2.748958244938034 | -7.112125454011175 | 15.438641679627132 | NS |
| CCNT1 | 0.6110831534492265 | 5.759913661608457e-10 | 0.6110831534492265 | 2.432797036117557e-11 | 5.759913661608457e-10 | 1.9001490486439334 | 7.0986581225915835 | 15.363804354915274 | NS |
| PALM2-AKAP2 | 0.7638823375186024 | 6.301419899887467e-10 | 0.7638823375186024 | 2.714214557511717e-11 | 6.301419899887467e-10 | 1.7446142634026764 | 7.079502209141928 | 15.257496396888083 | NS |
| AHNAK | 0.6561130581780068 | 6.761924613775657e-10 | 0.6561130581780068 | 2.936805779446145e-11 | 6.761924613775657e-10 | 7.246914088072921 | 7.06569098486841 | 15.180952169398804 | NS |
| RASEF | 0.6197018445331453 | 8.042784570955244e-10 | 0.6197018445331453 | 3.5988085570496913e-11 | 8.042784570955244e-10 | 2.1106964373742807 | 7.030002597396797 | 14.983561610928504 | NS |
| SKIL | 0.6231928152541077 | 8.222728621302085e-10 | 0.6231928152541077 | 3.689150603141087e-11 | 8.222728621302085e-10 | 3.597289035954678 | 7.025642988863643 | 14.959488615705837 | NS |
| LAT | -0.5526237854886933 | 8.285900084668382e-10 | -0.5526237854886933 | 3.7224427168114124e-11 | 8.285900084668382e-10 | 3.2155081448503853 | -7.024062923112867 | 14.950765913398772 | NS |
| GOLIM4 | 0.5875936396760233 | 8.553988341451309e-10 | 0.5875936396760233 | 3.8633060610247975e-11 | 8.553988341451309e-10 | 4.734212764388724 | 7.0175281527296685 | 14.914703049663146 | NS |
| TNFRSF10C | 0.7684933240750218 | 1.0586599117219075e-9 | 0.7684933240750218 | 4.898902778537139e-11 | 1.0586599117219075e-9 | 2.657255034910803 | 6.97566597204422 | 14.684146934464177 | NS |
| EIF2AK2 | 0.633910809017654 | 1.116695059038345e-9 | 0.633910809017654 | 5.216891906135288e-11 | 1.116695059038345e-9 | 3.2747418097300813 | 6.964556865341713 | 14.623099153169232 | NS |
| SCAND1 | -0.6238538809125447 | 1.1363115350485504e-9 | -0.6238538809125447 | 5.322111496971525e-11 | 1.1363115350485504e-9 | 3.9424332901087427 | -6.961027561451148 | 14.603716559175677 | NS |
| SULT1A2 | -0.5136166700467504 | 1.3085906112870944e-9 | -0.5136166700467504 | 6.254092174142276e-11 | 1.3085906112870944e-9 | 2.9691286786733455 | -6.9324702178418 | 14.447095205496215 | NS |
| HDAC10 | -0.5021178900781385 | 1.33055670384063e-9 | -0.5021178900781385 | 6.389670518758972e-11 | 1.33055670384063e-9 | 2.602417359182146 | -6.928669792782732 | 14.426280594579609 | NS |
| ANTXR2 | 0.5037795247690684 | 1.6781800510483934e-9 | 0.5037795247690684 | 8.351299256367237e-11 | 1.6781800510483934e-9 | 3.660860009601493 | 6.881127564546621 | 14.166467481349677 | NS |
| GTF2A1 | 0.6361075970896937 | 1.7528376235820693e-9 | 0.6361075970896937 | 8.848484329570754e-11 | 1.7528376235820693e-9 | 2.6670417423961394 | 6.870834464525403 | 14.110356863683538 | NS |
| PIDD | -0.5225479850422392 | 2.1341005807698975e-9 | -0.5225479850422392 | 1.1130114146676149e-10 | 2.1341005807698975e-9 | 2.167075878628326 | -6.82991547935584 | 13.887792385850386 | NS |
| SAMHD1 | 0.5614683938666634 | 2.4985053818595566e-9 | 0.5614683938666634 | 1.329929084913594e-10 | 2.4985053818595566e-9 | 5.7526354026077735 | 6.798059907436242 | 13.715077802728967 | NS |
| DDX21 | 0.5866681220010621 | 2.841758845802831e-9 | 0.5866681220010621 | 1.535038457937004e-10 | 2.841758845802831e-9 | 4.339992165973782 | 6.772337258600801 | 13.57597027417313 | NS |
| COX4I2 | -0.7137026801211483 | 3.146483472217269e-9 | -0.7137026801211483 | 1.7347759295604166e-10 | 3.146483472217269e-9 | 4.201742891564764 | -6.750355679495803 | 13.457347548671663 | NS |
| ELK3 | 0.5997956120504302 | 3.5162641172005894e-9 | 0.5997956120504302 | 1.9640999758543229e-10 | 3.5162641172005894e-9 | 4.101928252100511 | 6.728002596257492 | 13.33696048358826 | NS |
| ATHL1 | -0.7017379542527524 | 3.6579295521660687e-9 | -0.7017379542527524 | 2.0476014041338227e-10 | 3.6579295521660687e-9 | 4.3077592593302265 | -6.7204970454413555 | 13.296592395753759 | NS |
| TCP11L2 | 0.5151357931590712 | 5.366805809578674e-9 | 0.5151357931590712 | 3.1324268331192813e-10 | 5.366805809578674e-9 | 3.287128785762324 | 6.643577253195017 | 12.884478115376435 | NS |
| GOLT1A | -0.511189683662626 | 5.3982927586717716e-9 | -0.511189683662626 | 3.1540297018824254e-10 | 5.3982927586717716e-9 | 2.528095937602668 | -6.642329515110556 | 12.87781716845139 | NS |
| C16orf48 | -0.5614656813006138 | 5.820749908882486e-9 | -0.5614656813006138 | 3.4321525539560387e-10 | 5.820749908882486e-9 | 3.0312122929217833 | -6.626976480129276 | 12.79591958815968 | NS |
| LOC100128071 | -0.5880515327974376 | 6.2975066354736375e-9 | -0.5880515327974376 | 3.7471274323028515e-10 | 6.2975066354736375e-9 | 1.9572636885000219 | -6.611002742888453 | 12.710835625394555 | NS |
| DDR2 | 0.695410262278384 | 6.3501730768003776e-9 | 0.695410262278384 | 3.789845811412615e-10 | 6.3501730768003776e-9 | 2.079456076012395 | 6.60893878178383 | 12.699851249154758 | NS |
| SGPP2 | 0.6967729608142488 | 8.81613672798858e-9 | 0.6967729608142488 | 5.519631573530099e-10 | 8.81613672798858e-9 | 2.950284953001775 | 6.54026520452553 | 12.335591239939774 | NS |
| SESN3 | 0.5916613437314262 | 9.193676832120823e-9 | 0.5916613437314262 | 5.772480046931708e-10 | 9.193676832120823e-9 | 1.6079643293713783 | 6.532055889486369 | 12.292206565761521 | NS |
| RAB17 | -0.5069871696113752 | 9.297077465629688e-9 | -0.5069871696113752 | 5.848511005023037e-10 | 9.297077465629688e-9 | 3.5210747732476135 | -6.5296564420230485 | 12.279532403228007 | NS |
| GPSM1 | -0.5386338518339189 | 1.1033281692352733e-8 | -0.5386338518339189 | 7.145036952333092e-10 | 1.1033281692352733e-8 | 3.196610184768948 | -6.49287468015505 | 12.085613898731413 | NS |
| LNPEP | 0.526052516755477 | 1.1199670079623468e-8 | 0.526052516755477 | 7.285074571895398e-10 | 1.1199670079623468e-8 | 1.480633442219125 | 6.489302604228649 | 12.066818245763177 | NS |
| TMED8 | 0.5736208823525728 | 1.1460152504647159e-8 | 0.5736208823525728 | 7.483091395889447e-10 | 1.1460152504647159e-8 | 1.6858608232638945 | 6.484365150080595 | 12.040848971951938 | NS |
| MICALCL | 0.5308888977872241 | 1.2947924334996793e-8 | 0.5308888977872241 | 8.593789316077087e-10 | 1.2947924334996793e-8 | 2.1497326041290785 | 6.458850091129891 | 11.906848285654924 | NS |
| BICC1 | 0.5574862369039268 | 1.3744090822676182e-8 | 0.5574862369039268 | 9.237171978917919e-10 | 1.3744090822676182e-8 | 2.0283520862888245 | 6.445515707736937 | 11.836951848422068 | NS |
| GNAQ | 0.7285466512000758 | 1.4632992868811126e-8 | 0.7285466512000758 | 9.8695554984693e-10 | 1.4632992868811126e-8 | 4.806216510206056 | 6.4332707150482085 | 11.772846764318196 | NS |
| CRYAB | -0.5324237178638755 | 1.5750927547391462e-8 | -0.5324237178638755 | 1.0708259483201795e-9 | 1.5750927547391462e-8 | 4.857246968328236 | -6.418169586977663 | 11.693896254796798 | NS |
| TFPI | 0.5272972951869503 | 2.0978167700473667e-8 | 0.5272972951869503 | 1.4813426263193665e-9 | 2.0978167700473667e-8 | 6.162405844181833 | 6.357870910284012 | 11.379832944800459 | NS |
| SOD2 | 0.8088436988501817 | 2.1967032657911985e-8 | 0.8088436988501817 | 1.5590438376007787e-9 | 2.1967032657911985e-8 | 7.142751510247472 | 6.34834010264916 | 11.330366616251265 | NS |
| ROR1 | 0.5416012547654894 | 2.3430499063734642e-8 | 0.5416012547654894 | 1.672707233476486e-9 | 2.3430499063734642e-8 | 2.253321572150174 | 6.335206972942262 | 11.262282172998361 | NS |
| C20orf46 | -0.639530401697995 | 2.4044820653489582e-8 | -0.639530401697995 | 1.7208731192353496e-9 | 2.4044820653489582e-8 | 3.442739995120855 | -6.329904231296365 | 11.234817656216983 | NS |
| MSI2 | 0.5220345436436009 | 2.621713568614124e-8 | 0.5220345436436009 | 1.8935729162163066e-9 | 2.621713568614124e-8 | 3.1776525754958254 | 6.3120206385701625 | 11.142302871129797 | NS |
| EGFL7 | -0.6600513908615318 | 2.6959091449715827e-8 | -0.6600513908615318 | 1.9568251455525855e-9 | 2.6959091449715827e-8 | 5.124453743923302 | -6.305869063208959 | 11.110518980400716 | NS |
| KCNA3 | 0.5251355748569495 | 3.083262770678363e-8 | 0.5251355748569495 | 2.28219282685375e-9 | 3.083262770678363e-8 | 2.1526998873862877 | 6.277023602077624 | 10.961749339843283 | NS |
| KLF2 | 0.8409286733337122 | 3.2008239994557074e-8 | 0.8409286733337122 | 2.388332143688499e-9 | 3.2008239994557074e-8 | 5.355581975015571 | 6.268482996544316 | 10.917786663590839 | NS |
| PANK3 | 0.5075256240447457 | 4.019688623967763e-8 | 0.5075256240447457 | 3.109801522216532e-9 | 4.019688623967763e-8 | 2.048773001843549 | 6.21874841360013 | 10.662556697950652 | NS |
| HIGD1B | -0.5973731850287081 | 4.198756114841118e-8 | -0.5973731850287081 | 3.283452867152771e-9 | 4.198756114841118e-8 | 4.919211683328959 | -6.2084802093901965 | 10.610028095264806 | NS |
| CCDC75 | 0.5062872925134192 | 4.558117716284627e-8 | 0.5062872925134192 | 3.6107677231575454e-9 | 4.558117716284627e-8 | 3.045380734911629 | 6.190497755887597 | 10.518173769705559 | NS |
| PTPRG | 0.5207439172404009 | 4.645494159871251e-8 | 0.5207439172404009 | 3.6827592748366992e-9 | 4.645494159871251e-8 | 2.485391440123298 | 6.186757764521528 | 10.499091974121178 | NS |
| CRIP1 | -0.67413648580757 | 4.728459098461183e-8 | -0.67413648580757 | 3.7654794063258e-9 | 4.728459098461183e-8 | 8.276820520376354 | -6.18254797155633 | 10.47762231267064 | NS |
| NPFF | -0.5671485084264669 | 5.7267614902038006e-8 | -0.5671485084264669 | 4.673371285989839e-9 | 5.7267614902038006e-8 | 1.756154436964948 | -6.1415174360715366 | 10.268876057678312 | NS |
| NRN1L | -0.5083606795180737 | 5.976732059391306e-8 | -0.5083606795180737 | 4.930919991647884e-9 | 5.976732059391306e-8 | 1.3715191286525876 | -6.13130110008036 | 10.217043033208718 | NS |
| CLIC3 | -0.6335065655058836 | 6.234263834118712e-8 | -0.6335065655058836 | 5.169459466967425e-9 | 6.234263834118712e-8 | 5.503040677566761 | -6.1222952546108935 | 10.171399094321423 | NS |
| PCP2 | -0.5594860491912836 | 6.32334013006678e-8 | -0.5594860491912836 | 5.258432081398505e-9 | 6.32334013006678e-8 | 1.5374175248113704 | -6.119040166923934 | 10.154912465511604 | NS |
| CD52 | -0.5771971283472652 | 6.815110957879493e-8 | -0.5771971283472652 | 5.7162409850426005e-9 | 6.815110957879493e-8 | 8.383599605151623 | -6.103101110750285 | 10.07426746921767 | NS |
| PCDHGB7 | 0.5227664923307995 | 7.713984053853212e-8 | 0.5227664923307995 | 6.5853893380466205e-9 | 7.713984053853212e-8 | 2.353838295625089 | 6.076015950408111 | 9.937550297791603 | NS |
| TIAF1 | -0.5342840963507858 | 7.972766721701571e-8 | -0.5342840963507858 | 6.834888730295569e-9 | 7.972766721701571e-8 | 1.3462112469864203 | -6.068887424649732 | 9.901635502148785 | NS |
| INHBA | 0.8149112212510894 | 8.350488593486551e-8 | 0.8149112212510894 | 7.1986110522737885e-9 | 8.350488593486551e-8 | 3.3774468735067464 | 6.058939633459332 | 9.851564030754126 | NS |
| SLC30A1 | 0.5218782298794231 | 1.2420304167058416e-7 | 0.5218782298794231 | 1.1382248994723467e-8 | 1.2420304167058416e-7 | 2.675006586779831 | 5.970580997269295 | 9.409251700373773 | NS |
| PRSS8 | -0.5116798750931446 | 1.2832492530829937e-7 | -0.5116798750931446 | 1.1790652674841056e-8 | 1.2832492530829937e-7 | 5.020461865699606 | -5.963748281774539 | 9.375231464803118 | NS |
| NAT14 | -0.5106603157700769 | 1.2955931789517027e-7 | -0.5106603157700769 | 1.1911810158352771e-8 | 1.2955931789517027e-7 | 2.8199744936870283 | -5.961765825295513 | 9.365365731910114 | NS |
| MXD1 | 0.5782257744755812 | 1.6543705804255928e-7 | 0.5782257744755812 | 1.573426109108993e-8 | 1.6543705804255928e-7 | 3.3216758101361386 | 5.907634611228651 | 9.096846195381861 | NS |
| EFCAB4A | -0.5196725049775259 | 2.2907119552583617e-7 | -0.5196725049775259 | 2.2703214850191897e-8 | 2.2907119552583617e-7 | 3.158428529274365 | -5.835829412054549 | 8.743251409703866 | NS |
| KLF6 | 0.5291601445346421 | 2.5577412952053967e-7 | 0.5291601445346421 | 2.5609501229250525e-8 | 2.5577412952053967e-7 | 6.5943884678094395 | 5.812115645840883 | 8.627132771471352 | NS |
| ZBED6 | 0.638962654691866 | 2.699823458775842e-7 | 0.638962654691866 | 2.7281454621627048e-8 | 2.699823458775842e-7 | 1.1082841024168328 | 5.799640082808902 | 8.566175698487832 | NS |
| VSIG2 | -0.5706423930759641 | 2.7358312935655017e-7 | -0.5706423930759641 | 2.775220465066146e-8 | 2.7358312935655017e-7 | 4.298499830339947 | -5.796262317718939 | 8.549687200243909 | NS |
| MAN1A1 | 0.5334697247906126 | 2.7509098511187514e-7 | 0.5334697247906126 | 2.793802943366914e-8 | 2.7509098511187514e-7 | 4.855403981932016 | 5.794944373388557 | 8.543255490984603 | NS |
| GPR15 | 0.5374712432835832 | 2.7557409437026473e-7 | 0.5374712432835832 | 2.800355663563058e-8 | 2.7557409437026473e-7 | 1.0917481627971914 | 5.79448167162773 | 8.540997698195515 | NS |
| ST8SIA6 | 0.5720363740984189 | 2.7700173273731607e-7 | 0.5720363740984189 | 2.8165180065649797e-8 | 2.7700173273731607e-7 | 1.4943345148611753 | 5.793344924622674 | 8.535451376568176 | NS |
| KIRREL | 0.5348829397763692 | 3.0471282665841016e-7 | 0.5348829397763692 | 3.116484612218162e-8 | 3.0471282665841016e-7 | 2.9437616682878525 | 5.773330803655428 | 8.437924290044943 | NS |
| ARL5B | 0.6602774010663874 | 3.05238298029087e-7 | 0.6602774010663874 | 3.1236824453302236e-8 | 3.05238298029087e-7 | 2.4267363258991868 | 5.772874059681841 | 8.435701361775763 | NS |
| ZBTB16 | 0.798407922826871 | 3.329695537522751e-7 | 0.798407922826871 | 3.4572022487690675e-8 | 3.329695537522751e-7 | 2.9583276398094718 | 5.752765540328008 | 8.337956901990111 | NS |
| NFKBIZ | 0.6843132669981591 | 4.378256815285047e-7 | 0.6843132669981591 | 4.7656275270024235e-8 | 4.378256815285047e-7 | 5.419256141820139 | 5.68883953649066 | 8.02881175499758 | NS |
| DYRK3 | 0.5878868960746924 | 4.847522676907726e-7 | 0.5878868960746924 | 5.33433106569331e-8 | 4.847522676907726e-7 | 2.8397921164027204 | 5.666274979147666 | 7.920271033904071 | NS |
| CLMP | 0.5213158657657366 | 4.952131169975194e-7 | 0.5213158657657366 | 5.476070730404496e-8 | 4.952131169975194e-7 | 2.2247195781951787 | 5.661017529624366 | 7.895025282298254 | NS |
| UPK3BL | -0.6259279208620789 | 5.281529446760315e-7 | -0.6259279208620789 | 5.8876479763753794e-8 | 5.281529446760315e-7 | 4.047828442561746 | -5.646472269067993 | 7.825266832690374 | NS |
| IKZF3 | 0.5082140074590134 | 5.805324961672207e-7 | 0.5082140074590134 | 6.551322571598543e-8 | 5.805324961672207e-7 | 1.6669519360689318 | 5.624989158455329 | 7.722467621927321 | NS |
| SPTBN1 | 0.5088978946923373 | 8.21002028751209e-7 | 0.5088978946923373 | 9.740785166974736e-8 | 8.21002028751209e-7 | 6.717018727732636 | 5.54472853710175 | 7.340884798792042 | NS |
| PALM3 | -0.7088190873687688 | 8.66771502915236e-7 | -0.7088190873687688 | 1.0351133486633352e-7 | 8.66771502915236e-7 | 2.4627497692209697 | -5.532363055682223 | 7.282444900454306 | NS |
| CYP1B1 | 0.6311162854151129 | 1.1203522518471674e-6 | 0.6311162854151129 | 1.3868031936360182e-7 | 1.1203522518471674e-6 | 3.3594606244732392 | 5.472591091033629 | 7.001286006349708 | NS |
| ITGB6 | 0.546287383743532 | 1.3494848610390757e-6 | 0.546287383743532 | 1.7099333235341895e-7 | 1.3494848610390757e-6 | 4.006927521258171 | 5.429518005446372 | 6.8000480940871375 | NS |
| TNFAIP3 | 0.6668653103264193 | 1.833494980831196e-6 | 0.6668653103264193 | 2.402608600810508e-7 | 1.833494980831196e-6 | 4.708268841951698 | 5.359082528230888 | 6.473473115724256 | NS |
| RPL37 | 0.6065868896840003 | 2.2036619636727796e-6 | 0.6065868896840003 | 2.9673541227782096e-7 | 2.2036619636727796e-6 | 6.946446313380924 | 5.31504292457589 | 6.270873581781641 | NS |
| SPSB2 | -0.5006061251869811 | 2.567341902269112e-6 | -0.5006061251869811 | 3.5306894432304773e-7 | 2.567341902269112e-6 | 3.1058549579555987 | -5.278595463229042 | 6.104134275348929 | NS |
| SLC22A31 | -0.5998641993490623 | 2.6810236806425174e-6 | -0.5998641993490623 | 3.7126548131485483e-7 | 2.6810236806425174e-6 | 3.706917361925944 | -5.268026036053155 | 6.0559403275764 | NS |
| GGTLC1 | -0.596090251768647 | 3.5323792062866033e-6 | -0.596090251768647 | 5.037211999167287e-7 | 3.5323792062866033e-6 | 3.416855641253267 | -5.203541326912248 | 5.763463334973264 | NS |
| SLIT3 | 0.54898076061014 | 4.668809446268664e-6 | 0.54898076061014 | 6.958883241700088e-7 | 4.668809446268664e-6 | 3.8107861176934787 | 5.1346340041018514 | 5.453907719397503 | NS |
| ITGA8 | 0.6128712489427879 | 4.782849925972597e-6 | 0.6128712489427879 | 7.143273083775311e-7 | 4.782849925972597e-6 | 3.156415678296087 | 5.129029767211546 | 5.428867969761227 | NS |
| LDLR | 0.5709149535893259 | 5.384141269100081e-6 | 0.5709149535893259 | 8.163540558561446e-7 | 5.384141269100081e-6 | 5.390311886058788 | 5.10035357364096 | 5.301065584246159 | NS |
| SGMS2 | 0.5465389741588909 | 5.56105263931624e-6 | 0.5465389741588909 | 8.448388112659776e-7 | 5.56105263931624e-6 | 4.198326310574669 | 5.092968624537511 | 5.268240456577476 | NS |
| GALNT5 | 0.5352866756555419 | 7.224554095774129e-6 | 0.5352866756555419 | 1.1351082664368217e-6 | 7.224554095774129e-6 | 2.833777989539836 | 5.0290652393328 | 4.985706200454735 | NS |
| COL8A1 | 0.5370108122655473 | 7.31171697161805e-6 | 0.5370108122655473 | 1.1505503616250638e-6 | 7.31171697161805e-6 | 3.870863372794847 | 5.026127968975723 | 4.972784968392651 | NS |
| CST6 | -0.5133507852067178 | 1.0539481481484694e-5 | -0.5133507852067178 | 1.7434628246747786e-6 | 1.0539481481484694e-5 | 3.964671454994959 | -4.935182922428841 | 4.575572850080101 | NS |
| VWF | 0.6469834445144755 | 1.410272308973575e-5 | 0.6469834445144755 | 2.4247348737833497e-6 | 1.410272308973575e-5 | 5.717385278669043 | 4.862159936797658 | 4.260683732668693 | NS |
| ITLN2 | -0.6432022236540313 | 1.4818284313921743e-5 | -0.6432022236540313 | 2.571665925798594e-6 | 1.4818284313921743e-5 | 3.2711384435968514 | -4.849053984277544 | 4.204553311107664 | NS |
| TNNC1 | -0.5608425779441575 | 1.6894567236054224e-5 | -0.5608425779441575 | 2.9774164135468044e-6 | 1.6894567236054224e-5 | 5.6267049476680855 | -4.816307871086071 | 4.0648227844441545 | NS |
| AKAP12 | 0.6053127020193285 | 1.8786227394366377e-5 | 0.6053127020193285 | 3.3545664156654175e-6 | 1.8786227394366377e-5 | 3.760970990233014 | 4.7895320616028005 | 3.9511168718939738 | NS |
| ISG15 | -0.5395796935856314 | 2.0602778308636138e-5 | -0.5395796935856314 | 3.7306303275868417e-6 | 2.0602778308636138e-5 | 5.183660386259668 | -4.765587301222114 | 3.8498532280281568 | NS |
| RBM14-RBM4 | 0.5710685553547279 | 2.0832763984382643e-5 | 0.5710685553547279 | 3.7784976077773884e-6 | 2.0832763984382643e-5 | 4.320240196171403 | 4.76270845319589 | 3.837705202980099 | NS |
| PTGS2 | 0.7564673669843467 | 2.2198385802816817e-5 | 0.7564673669843467 | 4.056685714249157e-6 | 2.2198385802816817e-5 | 4.720144865600626 | 4.746644475803796 | 3.7700249300975495 | NS |
| FGG | 1.3858609526337493 | 2.8549969800668855e-5 | 1.3858609526337493 | 5.394799837476288e-6 | 2.8549969800668855e-5 | 3.588950593431231 | 4.681787129417427 | 3.498601016601646 | Up |
| BTG2 | 0.53619776662529 | 2.9103892560099638e-5 | 0.53619776662529 | 5.516855910938297e-6 | 2.9103892560099638e-5 | 6.78321369234968 | 4.6766697673589475 | 3.477310643164489 | NS |
| NCOA7 | 0.6143651740519447 | 2.9400228994636377e-5 | 0.6143651740519447 | 5.583566997667067e-6 | 2.9400228994636377e-5 | 5.462877567545666 | 4.673918799272999 | 3.4658730726968843 | NS |
| TNIP3 | 0.567060707841532 | 3.0279301975891662e-5 | 0.567060707841532 | 5.790312780024447e-6 | 3.0279301975891662e-5 | 1.522415227461431 | 4.665590277616255 | 3.4312784424108544 | NS |
| CDKN1A | 0.6570288362328736 | 3.36056249953647e-5 | 0.6570288362328736 | 6.510244961837384e-6 | 3.36056249953647e-5 | 6.090164904351258 | 4.638672616723033 | 3.3198035828503007 | NS |
| SERPINE1 | 0.8828709917259228 | 4.691091759585114e-5 | 0.8828709917259228 | 9.46806131068041e-6 | 4.691091759585114e-5 | 3.669279074160312 | 4.551875364382707 | 2.963848035034572 | NS |
| S100A8 | 0.6722700056300672 | 4.810099053422933e-5 | 0.6722700056300672 | 9.747210699092293e-6 | 4.810099053422933e-5 | 6.890419292895621 | 4.5450916756343736 | 2.9362545638576583 | NS |
| C11orf96 | 0.7463802948223286 | 5.349060466082562e-5 | 0.7463802948223286 | 1.0983165554648286e-5 | 5.349060466082562e-5 | 5.449292669560686 | 4.51714296025279 | 2.822918055526741 | NS |
| CAMP | -0.546386840194192 | 5.604279759143347e-5 | -0.546386840194192 | 1.1567469124702948e-5 | 5.604279759143347e-5 | 2.7735579300947344 | -4.50496910923439 | 2.773726767704715 | NS |
| FGA | 0.5845693087217068 | 5.827745583421553e-5 | 0.5845693087217068 | 1.2073971971626707e-5 | 5.827745583421553e-5 | 1.2356940252150468 | 4.494885741762011 | 2.7330634522233987 | NS |
| JUNB | 0.6508559659347615 | 7.700474853407776e-5 | 0.6508559659347615 | 1.654734933252152e-5 | 7.700474853407776e-5 | 8.107919304147556 | 4.420215528450517 | 2.434231232362971 | NS |
| FBN1 | 0.5230894028765802 | 8.050963131079009e-5 | 0.5230894028765802 | 1.738226940421742e-5 | 8.050963131079009e-5 | 3.1085678312508 | 4.408470086510351 | 2.3875947807429307 | NS |
| EMP1 | 0.5695589666489536 | 9.218677538068989e-5 | 0.5695589666489536 | 2.0179817501563078e-5 | 9.218677538068989e-5 | 6.758160427446865 | 4.372721073816528 | 2.2462707164273583 | NS |
| ATF3 | 0.797577339727054 | 9.232370287552524e-5 | 0.797577339727054 | 2.0219767891849903e-5 | 9.232370287552524e-5 | 5.7445321105666505 | 4.372245857785603 | 2.244398387876122 | NS |
| MMRN1 | 0.5866507854254701 | 9.444745829509605e-5 | 0.5866507854254701 | 2.0741314098379417e-5 | 9.444745829509605e-5 | 3.149062463720777 | 4.366123310903328 | 2.2202906793514368 | NS |
| THBS1 | 0.8353498426523371 | 9.688451456689761e-5 | 0.8353498426523371 | 2.132281209537313e-5 | 9.688451456689761e-5 | 5.861706630001244 | 4.359468777897515 | 2.194119503823825 | NS |
| ZFP36 | 0.6846481354048315 | 9.727806164391323e-5 | 0.6846481354048315 | 2.1415237299589e-5 | 9.727806164391323e-5 | 8.509513863937622 | 4.35842715330234 | 2.190025914559482 | NS |
| GNLY | -0.5669752031682052 | 9.764796601404145e-5 | -0.5669752031682052 | 2.1502503299346246e-5 | 9.764796601404145e-5 | 4.353914909608114 | -4.357447623702571 | 2.1861770871497415 | NS |
| F13A1 | 0.5952767171316138 | 1.2912359242621356e-4 | 0.5952767171316138 | 2.9363039047596204e-5 | 1.2912359242621356e-4 | 4.171067818695556 | 4.281912811825007 | 1.891514533100593 | NS |
| NAMPT | 0.632662246034756 | 1.4211782320406783e-4 | 0.632662246034756 | 3.2586520393548636e-5 | 1.4211782320406783e-4 | 6.047250306762796 | 4.256440635077762 | 1.793101265144725 | NS |
| KDM6B | 0.5155958014111959 | 1.4854044376524142e-4 | 0.5155958014111959 | 3.4350920474057566e-5 | 1.4854044376524142e-4 | 3.90285483214266 | 4.243502826196006 | 1.7433004973792334 | NS |
| C1orf15-NBL1 | -0.7336691771599109 | 1.655316541361565e-4 | -0.7336691771599109 | 3.871536089031917e-5 | 1.655316541361565e-4 | 1.6845907902466377 | -4.214047337472784 | 1.6303860077686219 | NS |
| MAFF | 0.6334600937251746 | 1.8030743856105828e-4 | 0.6334600937251746 | 4.250511694616978e-5 | 1.8030743856105828e-4 | 4.691209943774711 | 4.190942546492458 | 1.5422715655804895 | NS |
| STEAP4 | 0.5091550456507887 | 1.8102182387701342e-4 | 0.5091550456507887 | 4.2695152677367165e-5 | 1.8102182387701342e-4 | 5.874492482878991 | 4.189836524473415 | 1.5380636073892182 | NS |
| COL14A1 | 0.613633581109164 | 1.8933566655696194e-4 | 0.613633581109164 | 4.4904868643953576e-5 | 1.8933566655696194e-4 | 3.339732641054272 | 4.177310385923519 | 1.490471088105548 | NS |
| PLA2G1B | -0.584415976066162 | 1.9396368228167995e-4 | -0.584415976066162 | 4.6129961118547574e-5 | 1.9396368228167995e-4 | 4.482718983303305 | -4.170617385636293 | 1.4650897885425005 | NS |
| LIF | 0.8004755317583734 | 2.0684436657400723e-4 | 0.8004755317583734 | 4.9613485381124264e-5 | 2.0684436657400723e-4 | 3.232737937823396 | 4.1524749745906915 | 1.3964598916885747 | NS |
| CSRNP1 | 0.6066955753802796 | 2.1602850516648484e-4 | 0.6066955753802796 | 5.198415788342201e-5 | 2.1602850516648484e-4 | 5.03587664598916 | 4.140811796075395 | 1.3524713104239696 | NS |
| RETN | -0.7844534191914283 | 2.241831675651285e-4 | -0.7844534191914283 | 5.410717467967735e-5 | 2.241831675651285e-4 | 4.956372958754592 | -4.130790442338552 | 1.314757277499889 | NS |
| GSTT2B | -0.6433083937124087 | 2.5187982858080596e-4 | -0.6433083937124087 | 6.14689706525236e-5 | 2.5187982858080596e-4 | 1.1535518159704192 | -4.098731728276819 | 1.1946205354695634 | NS |
| EGR1 | 0.795770866977076 | 2.6725237136849064e-4 | 0.795770866977076 | 6.573140647135885e-5 | 2.6725237136849064e-4 | 7.672061369330353 | 4.081807696261661 | 1.1315148664653787 | NS |
| DEFB1 | 0.8137822533559493 | 3.087215167263987e-4 | 0.8137822533559493 | 7.696367102570415e-5 | 3.087215167263987e-4 | 2.68199439933523 | 4.0417771640711155 | 0.9831213312525158 | NS |
| SOCS3 | 0.7135109380423765 | 3.0876870221389143e-4 | 0.7135109380423765 | 7.699388034176372e-5 | 3.0876870221389143e-4 | 6.7150729020021265 | 4.041677215237458 | 0.9827523556443509 | NS |
| SLIT2 | 0.5060836676274296 | 3.317361367686717e-4 | 0.5060836676274296 | 8.321644293516055e-5 | 3.317361367686717e-4 | 4.036472891212205 | 4.0218466183154415 | 0.9096965310315808 | NS |
| FOSB | 1.0957686233221473 | 3.373191661798379e-4 | 1.0957686233221473 | 8.46975599171909e-5 | 3.373191661798379e-4 | 7.042178740545236 | 4.017334993803057 | 0.8931179233964128 | Up |
| EGR3 | 0.6697461807078287 | 5.024995452369624e-4 | 0.6697461807078287 | 1.3238682086713687e-4 | 5.024995452369624e-4 | 3.5401129138072776 | 3.901819260419021 | 0.4739972852514045 | NS |
| DMBT1 | 0.6476975564501863 | 6.851571829543338e-4 | 0.6476975564501863 | 1.8799969779014609e-4 | 6.851571829543338e-4 | 4.597674736709139 | 3.8092829794114658 | 0.14575786754140196 | NS |
| C2CD4B | 0.5564547833964684 | 7.606652799525789e-4 | 0.5564547833964684 | 2.1303535649786067e-4 | 7.606652799525789e-4 | 2.243365889993563 | 3.7758853293933767 | 0.02894749334996316 | NS |
| CXCR2 | 0.5336570139057446 | 8.156951610027479e-4 | 0.5336570139057446 | 2.3107870562608462e-4 | 8.156951610027479e-4 | 2.0790031338661965 | 3.754046477715095 | -0.046957532632447396 | NS |
| IL7R | 0.5352205256449984 | 8.662040723830995e-4 | 0.5352205256449984 | 2.474573077325994e-4 | 8.662040723830995e-4 | 4.467549058572718 | 3.735576792952118 | -0.11085669295266154 | NS |
| FOLR3 | -0.5814875387128309 | 0.0013297325854947507 | -0.5814875387128309 | 4.017239790218624e-4 | 0.0013297325854947507 | 2.0644780219603334 | -3.602862869594792 | -0.5619811570737365 | NS |
| CLC | 0.679493027295397 | 0.0013863886655820837 | 0.679493027295397 | 4.204139355095679e-4 | 0.0013863886655820837 | 1.6191652151820681 | 3.5902171941113057 | -0.604226987076812 | NS |
| C7 | 0.5155618548056822 | 0.0014672493930621157 | 0.5155618548056822 | 4.477394049681156e-4 | 0.0014672493930621157 | 6.678244276905915 | 3.572649920666157 | -0.662699666406132 | NS |
| FOSL1 | 0.727605865577063 | 0.0016439233927327058 | 0.727605865577063 | 5.088217395153921e-4 | 0.0016439233927327058 | 2.553225838291183 | 3.536769981199115 | -0.7813476951583933 | NS |
| SLC6A14 | 0.5475814921381987 | 0.001773050375638594 | 0.5475814921381987 | 5.541907859096197e-4 | 0.001773050375638594 | 3.900474167227703 | 3.5126522717219704 | -0.8605112762927121 | NS |
| AREG | 0.6172222229422544 | 0.0019292209386488023 | 0.6172222229422544 | 6.093429178945109e-4 | 0.0019292209386488023 | 3.732835140377605 | 3.4857147805125637 | -0.9483688255698377 | NS |
| RPL21 | -1.0641116563624777 | 0.0024286862795414354 | -1.0641116563624777 | 7.882820094837576e-4 | 0.0024286862795414354 | 2.6653788133570346 | -3.4117976899554567 | -1.1863936110758413 | Down |
| HAS2 | 0.6176979223185683 | 0.002598273372719997 | 0.6176979223185683 | 8.490683642259623e-4 | 0.002598273372719997 | 2.7203669358850386 | 3.3902447970285543 | -1.254949461915527 | NS |
| FCGR3B | 0.5502733767967247 | 0.002699137195995708 | 0.5502733767967247 | 8.855762877357325e-4 | 0.002699137195995708 | 3.55241523347304 | 3.377983724221154 | -1.2937782133301976 | NS |
| NR4A3 | 0.7214537539321411 | 0.00296284675595484 | 0.7214537539321411 | 9.825415103832556e-4 | 0.00296284675595484 | 3.9410031890328963 | 3.3475762842806254 | -1.3895355276332921 | NS |
| MAPK15 | -0.5455825640411907 | 0.003009231606073239 | -0.5455825640411907 | 0.0010002607477263578 | 0.003009231606073239 | 2.6455579687476933 | -3.3423244452158594 | -1.4059965319229937 | NS |
| IGJ | 0.6565915547738737 | 0.0033657231789219755 | 0.6565915547738737 | 0.0011348716155648627 | 0.0033657231789219755 | 9.019661799473493 | 3.3050445707119276 | -1.522183827554521 | NS |
| MT1X | 0.5285313216754703 | 0.004255762520951243 | 0.5285313216754703 | 0.0014771479925160835 | 0.004255762520951243 | 6.900200863813724 | 3.226162677762874 | -1.7641975683643318 | NS |
| RND1 | 0.802681494131599 | 0.00436950428155805 | 0.802681494131599 | 0.0015226308903953706 | 0.00436950428155805 | 4.41598252316128 | 3.216993079377493 | -1.7919913193675407 | NS |
| S100A12 | 0.6758007270880055 | 0.004544211225727958 | 0.6758007270880055 | 0.001594912536660001 | 0.004544211225727958 | 2.8745911655244236 | 3.2029311210854634 | -1.8344765246945576 | NS |
| CCDC80 | 0.5626199402207712 | 0.0048136093038848495 | 0.5626199402207712 | 0.0016983796253506136 | 0.0048136093038848495 | 4.7372975583219565 | 3.1837981978713814 | -1.892014552810501 | NS |
| CXCL3 | 0.5842400665287162 | 0.004888318820272628 | 0.5842400665287162 | 0.0017273675740434073 | 0.004888318820272628 | 4.357865646350741 | 3.1786316665595855 | -1.9074987040758087 | NS |
| SELE | 0.736273115013359 | 0.005471860362150893 | 0.736273115013359 | 0.001965280153966854 | 0.005471860362150893 | 2.65510402779161 | 3.1390273124030323 | -2.0254425779529877 | NS |
| IL8 | 0.8109873906379077 | 0.006194709591226395 | 0.8109873906379077 | 0.00226412768260488 | 0.006194709591226395 | 5.254418680343423 | 3.0951385828985356 | -2.1545893311799915 | NS |
| CXCL2 | 0.6769323517720558 | 0.0069333711247017435 | 0.6769323517720558 | 0.0025717964820642287 | 0.0069333711247017435 | 6.70961224197087 | 3.055224998676705 | -2.2706125794819636 | NS |
| IL6 | 0.8928405022765986 | 0.007286689206707825 | 0.8928405022765986 | 0.002720842506966629 | 0.007286689206707825 | 5.425039809196442 | 3.0374502041944256 | -2.3218427628606575 | NS |
| ADAMTS1 | 0.5288857434601288 | 0.007316629346005483 | 0.5288857434601288 | 0.0027340651508013796 | 0.007316629346005483 | 5.477431942480586 | 3.035916925035799 | -2.3262492623431807 | NS |
| CCL24 | -0.639017476000292 | 0.007869552318859208 | -0.639017476000292 | 0.002971239061783272 | 0.007869552318859208 | 2.4824649301182165 | -3.0095141217965153 | -2.401811813590487 | NS |
| UPK3B | -0.5100083936686763 | 0.00847091010391443 | -0.5100083936686763 | 0.003234218679378525 | 0.00847091010391443 | 5.337619944801826 | -2.982415112240313 | -2.4787434121120517 | NS |
| MT1G | 0.6015968332605226 | 0.00972474356615417 | 0.6015968332605226 | 0.0037809087238503693 | 0.00972474356615417 | 4.477114305841228 | 2.932015669142183 | -2.6201377708968066 | NS |
| CXCL1 | 0.6435093653615906 | 0.011704311299093419 | 0.6435093653615906 | 0.004663824384070321 | 0.011704311299093419 | 4.549188143125219 | 2.86323468702858 | -2.809548584877034 | NS |
| CCL3L3 | -0.5375920893483914 | 0.01226473757242038 | -0.5375920893483914 | 0.004926735081449305 | 0.01226473757242038 | 1.9922783158870194 | -2.84505481359035 | -2.8589247673865454 | NS |
| CSF3 | 0.6865910378783195 | 0.028359156466140137 | 0.6865910378783195 | 0.012823373874915747 | 0.028359156466140137 | 3.0137240722163434 | 2.5123741333877034 | -3.7110502334164486 | NS |
| CAPS | -0.5696706469391217 | 0.03444213738032795 | -0.5696706469391217 | 0.015995768922556275 | 0.03444213738032795 | 3.6397587288216227 | -2.4307341862981877 | -3.905076705412799 | NS |
| ADAMTS4 | 0.6291011796050543 | 0.03571894227740763 | 0.6291011796050543 | 0.01668449152874284 | 0.03571894227740763 | 3.536388531934643 | 2.414933942220767 | -3.9419331559016175 | NS |

Abbreviations: COPD, chronic obstructive pulmonary disease; DEG, differentially expressed gene; AUC, area under the ROC curve; UPR, unfolded protein response; ERN1, endoplasmic reticulum to nucleus signaling 1; NS, non-significant.

## Supplementary Table S5. Reproducibility Script Inventory

This table lists the analysis scripts included in this supplementary document as text appendix sections. All scripts were executed in the software environment shown in Supplementary Table S3, using fixed random seeds where applicable.

| Script name | Purpose |
| --- | --- |
| tmp_limma_trend_sensitivity_20260509 | limma-trend sensitivity analysis in discovery cohort |
| run_internal_validation_cv_optimism_20260509 | Internal repeated CV and bootstrap optimism correction |
| run_external_validation_gse47460 | Primary external validation in GSE47460 |
| run_external_validation_gse38974_gpl4133 | Supplementary external validation in GSE38974 (probe-level and averaged analyses) |
| run_external_validation_gse37768 | Supplementary validation in GSE37768 |
| run_external_validation_gse76925_nonnorm | Supplementary validation in GSE76925 non-normalized matrix |
| run_supportive_validation_gse69818_emphysema | Supportive analysis in COPD-only emphysema cohort GSE69818 |
| run_age_adjusted_external_models_20260508 | Age-/sex-adjusted logistic sensitivity models in external cohorts |

## Supplementary Code Appendix

Full script text is provided below for direct reproducibility. Code was converted from original R scripts to plain text in this combined supplementary document.

### Code: tmp_limma_trend_sensitivity_20260509

Purpose: limma-trend sensitivity analysis in discovery cohort

Converted from: tmp_limma_trend_sensitivity_20260509.R

Original extension: .R

Detected encoding: utf-8

options(stringsAsFactors = FALSE)

suppressPackageStartupMessages(library(limma))

x <- read.delim(gzfile("GSE57148_COPD_FPKM_Normalized.txt.gz"), check.names = FALSE)

gene <- as.character(x[[1]])

mat <- as.matrix(x[, -1, drop = FALSE])

mode(mat) <- "numeric"

coln <- colnames(mat)

grp <- ifelse(grepl("-COPD$", coln), "COPD", ifelse(grepl("-NOR$", coln), "Control", NA))

keep <- !is.na(grp)

mat <- mat[, keep, drop = FALSE]

grp <- factor(grp[keep], levels = c("Control", "COPD"))

logm <- log2(mat + 1)

design <- model.matrix(~ grp)

fit <- lmFit(logm, design)

fit <- eBayes(fit, trend = TRUE)

tt <- topTable(

fit,

coef = "grpCOPD",

number = Inf,

adjust.method = "BH",

sort.by = "P"

)

tt$Gene <- gene[match(rownames(tt), rownames(logm))]

sig <- tt[abs(tt$logFC) > 0.5 & tt$adj.P.Val < 0.05, ]

up <- sig[sig$logFC > 0, ]

idx <- which(toupper(gene) == "ERN1")[1]

ern <- data.frame(

Gene = "ERN1",

logFC = fit$coefficients[idx, "grpCOPD"],

P = fit$p.value[idx, "grpCOPD"],

adjP = p.adjust(fit$p.value[, "grpCOPD"], method = "BH")[idx]

)

v <- logm[idx, ]

w <- wilcox.test(v[grp == "COPD"], v[grp == "Control"])

cat("DEG_n", nrow(sig), "\n")

cat("UP_n", nrow(up), "\n")

cat("ERN1_logFC", ern$logFC, "\n")

cat("ERN1_P", ern$P, "\n")

cat("ERN1_adjP", ern$adjP, "\n")

cat("ERN1_wilcox_P", w$p.value, "\n")

cat("ERN1_delta_mean", mean(v[grp == "COPD"]) - mean(v[grp == "Control"]), "\n")

### Code: run_internal_validation_cv_optimism_20260509

Purpose: Internal repeated CV and bootstrap optimism correction

Converted from: run_internal_validation_cv_optimism_20260509.R

Original extension: .R

Detected encoding: utf-8

options(stringsAsFactors = FALSE)

set.seed(20260509)

# ---------- helpers ----------

calc_auc <- function(y, score) {

r <- rank(score, ties.method = "average")

n1 <- sum(y == 1)

n0 <- sum(y == 0)

if (n1 == 0 || n0 == 0) return(NA_real_)

u <- sum(r[y == 1]) - n1 * (n1 + 1) / 2

u / (n1 * n0)

}

make_folds <- function(y, k = 10) {

idx1 <- which(y == 1)

idx0 <- which(y == 0)

idx1 <- sample(idx1)

idx0 <- sample(idx0)

f1 <- split(idx1, rep(1:k, length.out = length(idx1)))

f0 <- split(idx0, rep(1:k, length.out = length(idx0)))

folds <- vector("list", k)

for (i in seq_len(k)) folds[[i]] <- sort(c(f1[[i]], f0[[i]]))

folds

}

# ---------- load discovery data ----------

x <- read.delim(gzfile("GSE57148_COPD_FPKM_Normalized.txt.gz"), check.names = FALSE)

gene <- as.character(x[[1]])

mat <- as.matrix(x[, -1, drop = FALSE])

mode(mat) <- "numeric"

cn <- colnames(mat)

y_chr <- ifelse(grepl("-COPD$", cn), "COPD", ifelse(grepl("-NOR$", cn), "Control", NA))

keep <- !is.na(y_chr)

y_chr <- y_chr[keep]

y <- ifelse(y_chr == "COPD", 1, 0)

mat <- mat[, keep, drop = FALSE]

idx_ern1 <- which(toupper(gene) == "ERN1")[1]

if (is.na(idx_ern1)) stop("ERN1 not found.")

ern1_log2 <- log2(as.numeric(mat[idx_ern1, ]) + 1)

# ---------- apparent AUC ----------

auc_apparent <- calc_auc(y, ern1_log2)

# ---------- repeated stratified k-fold CV ----------

k <- 10

repeats <- 200

auc_cv <- numeric(repeats)

for (r in seq_len(repeats)) {

folds <- make_folds(y, k = k)

pred <- rep(NA_real_, length(y))

for (i in seq_len(k)) {

test_idx <- folds[[i]]

train_idx <- setdiff(seq_along(y), test_idx)

fit <- glm(y ~ ern1_log2, family = binomial(), subset = train_idx)

pred[test_idx] <- predict(fit, newdata = data.frame(ern1_log2 = ern1_log2[test_idx]), type = "response")

}

auc_cv[r] <- calc_auc(y, pred)

}

auc_cv_mean <- mean(auc_cv, na.rm = TRUE)

auc_cv_ci <- quantile(auc_cv, c(0.025, 0.975), na.rm = TRUE)

# ---------- bootstrap optimism correction ----------

B <- 2000

optimism <- numeric(B)

n <- length(y)

for (b in seq_len(B)) {

b_idx <- sample.int(n, n, replace = TRUE)

oob <- setdiff(seq_len(n), unique(b_idx))

# fit on bootstrap sample

fit_b <- glm(y ~ ern1_log2, family = binomial(), subset = b_idx)

pred_b_boot <- predict(fit_b, newdata = data.frame(ern1_log2 = ern1_log2[b_idx]), type = "response")

auc_b_boot <- calc_auc(y[b_idx], pred_b_boot)

pred_b_orig <- predict(fit_b, newdata = data.frame(ern1_log2 = ern1_log2), type = "response")

auc_b_orig <- calc_auc(y, pred_b_orig)

optimism[b] <- auc_b_boot - auc_b_orig

}

opt_mean <- mean(optimism, na.rm = TRUE)

auc_optimism_corrected <- auc_apparent - opt_mean

# ---------- output ----------

out <- data.frame(

metric = c(

"AUC_apparent_same_dataset",

"AUC_cv_mean_repeated_10fold",

"AUC_cv_ci_low",

"AUC_cv_ci_high",

"AUC_optimism_corrected_bootstrap",

"optimism_mean_bootstrap"

),

value = c(

auc_apparent,

auc_cv_mean,

as.numeric(auc_cv_ci[1]),

as.numeric(auc_cv_ci[2]),

auc_optimism_corrected,

opt_mean

)

)

write.csv(out, "internal_validation_cv_optimism_20260509.csv", row.names = FALSE)

summary_txt <- sprintf(

paste0(

"Discovery apparent AUC = %.3f. ",

"Repeated stratified 10-fold CV AUC = %.3f (95%% empirical interval %.3f-%.3f). ",

"Bootstrap optimism-corrected AUC = %.3f (mean optimism = %.3f; B=%d)."

),

auc_apparent,

auc_cv_mean,

as.numeric(auc_cv_ci[1]),

as.numeric(auc_cv_ci[2]),

auc_optimism_corrected,

opt_mean,

B

)

writeLines(summary_txt, "internal_validation_cv_optimism_summary_20260509.txt")

cat(summary_txt, "\n")

### Code: run_external_validation_gse47460

Purpose: Primary external validation in GSE47460

Converted from: run_external_validation_gse47460.R

Original extension: .R

Detected encoding: utf-8

options(stringsAsFactors = FALSE)

suppressPackageStartupMessages({

library(GEOquery)

})

set.seed(20260508)

g <- getGEO(filename = "GSE47460-GPL14550_series_matrix.txt.gz")

if (is.list(g)) g <- g[[1]]

pd <- pData(g)

fd <- fData(g)

ex <- exprs(g)

# Keep COPD vs Control only

disease <- pd$`disease state:ch1`

keep <- disease %in% c("Chronic Obstructive Lung Disease", "Control")

pd2 <- pd[keep, , drop = FALSE]

ex2 <- ex[, keep, drop = FALSE]

group <- ifelse(pd2$`disease state:ch1` == "Chronic Obstructive Lung Disease", "COPD", "Control")

y <- ifelse(group == "COPD", 1, 0)

# ERN1 feature

ern_idx <- which(fd$GENE_SYMBOL == "ERN1")

if (length(ern_idx) == 0) stop("ERN1 not found in GSE47460 feature table.")

if (length(ern_idx) > 1) {

# choose highest mean expression among ERN1 probes (if multiple)

mu <- rowMeans(ex[ern_idx, , drop = FALSE], na.rm = TRUE)

ern_idx <- ern_idx[which.max(mu)]

}

ern_id <- rownames(fd)[ern_idx]

ern_vals <- as.numeric(ex2[ern_idx, ])

calc_auc <- function(y, score) {

r <- rank(score, ties.method = "average")

n1 <- sum(y == 1)

n0 <- sum(y == 0)

u <- sum(r[y == 1]) - n1 * (n1 + 1) / 2

u / (n1 * n0)

}

tres <- t.test(ern_vals[y == 1], ern_vals[y == 0])

auc <- calc_auc(y, ern_vals)

boot_auc <- numeric(2000)

case_idx <- which(y == 1)

ctrl_idx <- which(y == 0)

for (i in seq_along(boot_auc)) {

b_case <- sample(case_idx, length(case_idx), replace = TRUE)

b_ctrl <- sample(ctrl_idx, length(ctrl_idx), replace = TRUE)

b_idx <- c(b_case, b_ctrl)

boot_auc[i] <- calc_auc(y[b_idx], ern_vals[b_idx])

}

auc_ci <- as.numeric(quantile(boot_auc, c(0.025, 0.975), na.rm = TRUE))

# Youden cutoff

thresholds <- sort(unique(ern_vals))

best_j <- -Inf

best_cut <- NA_real_

best_sens <- NA_real_

best_spec <- NA_real_

for (thr in thresholds) {

pred <- ifelse(ern_vals >= thr, 1, 0)

tp <- sum(pred == 1 & y == 1); fn <- sum(pred == 0 & y == 1)

tn <- sum(pred == 0 & y == 0); fp <- sum(pred == 1 & y == 0)

sens <- if ((tp + fn) > 0) tp/(tp + fn) else NA_real_

spec <- if ((tn + fp) > 0) tn/(tn + fp) else NA_real_

j <- sens + spec - 1

if (!is.na(j) && j > best_j) {

best_j <- j; best_cut <- thr; best_sens <- sens; best_spec <- spec

}

}

# Sex-adjusted model

sex <- pd2$`Sex:ch1`

sex_bin <- ifelse(sex == "M", 1, ifelse(sex == "F", 0, NA))

glm_dat <- data.frame(COPD = y, ERN1 = ern_vals, SexM = sex_bin)

glm_dat <- glm_dat[complete.cases(glm_dat), ]

fit <- glm(COPD ~ ERN1 + SexM, data = glm_dat, family = binomial())

co <- summary(fit)$coefficients

beta <- co["ERN1", "Estimate"]; se <- co["ERN1", "Std. Error"]; p_glm <- co["ERN1", "Pr(>|z|)"]

or <- exp(beta); or_l <- exp(beta - 1.96 * se); or_u <- exp(beta + 1.96 * se)

out <- data.frame(

dataset = "GSE47460-GPL14550",

ern1_feature_id = ern_id,

n_total = length(y),

n_COPD = sum(y == 1),

n_Control = sum(y == 0),

n_male = sum(pd2$`Sex:ch1` == "M", na.rm = TRUE),

n_female = sum(pd2$`Sex:ch1` == "F", na.rm = TRUE),

ERN1_COPD_mean = mean(ern_vals[y == 1]),

ERN1_COPD_sd = sd(ern_vals[y == 1]),

ERN1_Control_mean = mean(ern_vals[y == 0]),

ERN1_Control_sd = sd(ern_vals[y == 0]),

t_statistic = unname(tres$statistic),

p_ttest = tres$p.value,

AUC = auc,

AUC_CI_low = auc_ci[1],

AUC_CI_high = auc_ci[2],

cutoff_youden = best_cut,

sensitivity = best_sens,

specificity = best_spec,

OR_ERN1_adj_sex = or,

OR_ERN1_adj_sex_low95 = or_l,

OR_ERN1_adj_sex_high95 = or_u,

p_glm_ERN1 = p_glm,

stringsAsFactors = FALSE

)

write.csv(out, "external_validation_gse47460_results.csv", row.names = FALSE)

sample_out <- data.frame(

GSM = rownames(pd2),

group = group,

sex = pd2$`Sex:ch1`,

age = pd2$`age:ch1`,

smoker = pd2$`smoker?:ch1`,

ern1 = ern_vals,

stringsAsFactors = FALSE

)

write.csv(sample_out, "external_validation_gse47460_samplelevel.csv", row.names = FALSE)

summary_txt <- sprintf(

paste0(

"External validation in GSE47460 (COPD vs Control subset; N=%d, COPD=%d, Control=%d) identified ERN1 feature %s. ",

"ERN1 expression: COPD %.3f +/- %.3f vs Control %.3f +/- %.3f (Welch t=%.3f, p=%.3g). ",

"ROC AUC=%.3f (95%% CI %.3f-%.3f), cutoff %.3f, sensitivity %.1f%%, specificity %.1f%%. ",

"Sex-adjusted logistic model: OR=%.3f (95%% CI %.3f-%.3f), p=%.3g."

),

length(y), sum(y == 1), sum(y == 0), ern_id,

mean(ern_vals[y == 1]), sd(ern_vals[y == 1]),

mean(ern_vals[y == 0]), sd(ern_vals[y == 0]),

unname(tres$statistic), tres$p.value,

auc, auc_ci[1], auc_ci[2], best_cut, 100 * best_sens, 100 * best_spec,

or, or_l, or_u, p_glm

)

writeLines(summary_txt, "external_validation_gse47460_summary.txt", useBytes = TRUE)

cat(summary_txt, "\n")

### Code: run_external_validation_gse38974_gpl4133

Purpose: Supplementary external validation in GSE38974 (probe-level and averaged analyses)

Converted from: run_external_validation_gse38974_gpl4133.R

Original extension: .R

Detected encoding: utf-8

options(stringsAsFactors = FALSE)

series_file <- "GSE38974-GPL4133_series_matrix.txt.gz"

annot_file <- "GPL4133.annot.gz"

set.seed(20260508)

strip_quotes <- function(x) gsub('^"|"$', "", x)

split_meta <- function(line) {

parts <- strsplit(line, "\t", fixed = TRUE)[[1]]

strip_quotes(parts[-1])

}

all_lines <- readLines(gzfile(series_file), warn = FALSE, encoding = "UTF-8")

get_first_line <- function(prefix) {

idx <- grep(paste0("^", prefix), all_lines)

if (length(idx) == 0) return(NULL)

all_lines[idx[1]]

}

geo_line <- get_first_line("!Sample_geo_accession")

if (is.null(geo_line)) stop("Cannot find !Sample_geo_accession.")

gsm <- split_meta(geo_line)

char_lines <- all_lines[grep("^!Sample_characteristics_ch1", all_lines)]

extract_char <- function(keyword) {

hit <- char_lines[grepl(keyword, char_lines, fixed = TRUE)]

if (length(hit) == 0) return(rep(NA_character_, length(gsm)))

split_meta(hit[1])

}

diag_raw <- extract_char("diagnosis:")

sex_raw <- extract_char("gender (1=male, 2=female):")

diagnosis <- sub("^diagnosis:\\s*", "", diag_raw, ignore.case = TRUE)

group <- ifelse(tolower(diagnosis) == "copd", "COPD",

ifelse(tolower(diagnosis) == "normal", "Control", NA))

sex_code <- sub("^gender \\(1=male, 2=female\\):\\s*", "", sex_raw, ignore.case = TRUE)

sex <- ifelse(sex_code == "1", "M", ifelse(sex_code == "2", "F", NA))

start_idx <- grep("^!series_matrix_table_begin", all_lines)

end_idx <- grep("^!series_matrix_table_end", all_lines)

if (length(start_idx) == 0 || length(end_idx) == 0) stop("Table boundaries not found.")

expr_text <- paste(all_lines[(start_idx[1] + 1):(end_idx[1] - 1)], collapse = "\n")

expr <- read.delim(

text = expr_text,

header = TRUE,

sep = "\t",

check.names = FALSE,

quote = "\"",

comment.char = ""

)

id_col <- colnames(expr)[1]

expr_ids <- as.character(expr[[id_col]])

# Parse annotation and get ERN1 probes

annot_lines <- readLines(gzfile(annot_file), warn = FALSE, encoding = "UTF-8")

a_start <- grep("^!platform_table_begin", annot_lines)

a_end <- grep("^!platform_table_end", annot_lines)

if (length(a_start) == 0 || length(a_end) == 0) stop("Annotation table boundaries not found.")

annot_tab <- read.delim(

text = paste(annot_lines[(a_start[1] + 1):(a_end[1] - 1)], collapse = "\n"),

header = TRUE,

sep = "\t",

quote = "",

check.names = FALSE,

comment.char = ""

)

ern1_ann <- annot_tab[annot_tab$`Gene symbol` == "ERN1", c("ID", "Gene symbol", "Gene ID", "GenBank Accession"), drop = FALSE]

ern1_ids <- intersect(as.character(ern1_ann$ID), expr_ids)

if (length(ern1_ids) == 0) stop("No ERN1 probes found in expression matrix.")

# choose primary probe by canonical mRNA accession if available

primary_probe <- as.character(ern1_ann$ID[ern1_ann$`GenBank Accession` == "NM_001433"])

primary_probe <- primary_probe[primary_probe %in% ern1_ids]

if (length(primary_probe) == 0) primary_probe <- ern1_ids[1]

if (length(primary_probe) > 1) primary_probe <- primary_probe[1]

get_probe_values <- function(pid) {

row <- expr[expr[[id_col]] == pid, , drop = FALSE]

as.numeric(row[1, -1])

}

probe_mat <- sapply(ern1_ids, get_probe_values)

if (!is.matrix(probe_mat)) {

probe_mat <- matrix(probe_mat, ncol = 1)

colnames(probe_mat) <- ern1_ids

}

rownames(probe_mat) <- colnames(expr)[-1]

primary_vals <- probe_mat[, primary_probe]

mean4_vals <- rowMeans(probe_mat, na.rm = TRUE)

dat <- data.frame(

GSM = gsm,

group = group,

sex = sex,

ERN1_primary = primary_vals[gsm],

ERN1_mean4 = mean4_vals[gsm],

stringsAsFactors = FALSE

)

dat <- dat[!is.na(dat$group), ]

calc_auc <- function(y, score) {

r <- rank(score, ties.method = "average")

n1 <- sum(y == 1)

n0 <- sum(y == 0)

u <- sum(r[y == 1]) - n1 * (n1 + 1) / 2

u / (n1 * n0)

}

calc_metrics <- function(score, y, n_boot = 2000) {

case_vals <- score[y == 1]

ctrl_vals <- score[y == 0]

tres <- t.test(case_vals, ctrl_vals)

auc <- calc_auc(y, score)

case_idx <- which(y == 1)

ctrl_idx <- which(y == 0)

boot_auc <- numeric(n_boot)

for (i in seq_len(n_boot)) {

b_case <- sample(case_idx, length(case_idx), replace = TRUE)

b_ctrl <- sample(ctrl_idx, length(ctrl_idx), replace = TRUE)

b_idx <- c(b_case, b_ctrl)

boot_auc[i] <- calc_auc(y[b_idx], score[b_idx])

}

ci <- as.numeric(quantile(boot_auc, probs = c(0.025, 0.975), na.rm = TRUE))

thresholds <- sort(unique(score))

best_j <- -Inf

best <- c(NA, NA, NA)

for (thr in thresholds) {

pred <- ifelse(score >= thr, 1, 0)

tp <- sum(pred == 1 & y == 1)

fn <- sum(pred == 0 & y == 1)

tn <- sum(pred == 0 & y == 0)

fp <- sum(pred == 1 & y == 0)

sens <- if ((tp + fn) > 0) tp / (tp + fn) else NA_real_

spec <- if ((tn + fp) > 0) tn / (tn + fp) else NA_real_

j <- sens + spec - 1

if (!is.na(j) && j > best_j) {

best_j <- j

best <- c(thr, sens, spec)

}

}

list(

mean_case = mean(case_vals), sd_case = sd(case_vals),

mean_ctrl = mean(ctrl_vals), sd_ctrl = sd(ctrl_vals),

t = unname(tres$statistic), p = tres$p.value,

auc = auc, ci_low = ci[1], ci_high = ci[2],

cutoff = best[1], sens = best[2], spec = best[3]

)

}

y <- ifelse(dat$group == "COPD", 1, 0)

m1 <- calc_metrics(dat$ERN1_primary, y)

m2 <- calc_metrics(dat$ERN1_mean4, y)

n_total <- nrow(dat)

n_case <- sum(dat$group == "COPD")

n_ctrl <- sum(dat$group == "Control")

n_m <- sum(dat$sex == "M", na.rm = TRUE)

n_f <- sum(dat$sex == "F", na.rm = TRUE)

n_sex_missing <- sum(is.na(dat$sex))

out <- data.frame(

dataset = "GSE38974-GPL4133",

probe_strategy = c("primary_NM001433_probe", "mean_of_4_ERN1_probes"),

primary_probe = c(primary_probe, primary_probe),

probes_used = c(primary_probe, paste(ern1_ids, collapse = ";")),

n_total = c(n_total, n_total),

n_COPD = c(n_case, n_case),

n_Control = c(n_ctrl, n_ctrl),

n_male = c(n_m, n_m),

n_female = c(n_f, n_f),

n_sex_missing = c(n_sex_missing, n_sex_missing),

ERN1_COPD_mean = c(m1$mean_case, m2$mean_case),

ERN1_COPD_sd = c(m1$sd_case, m2$sd_case),

ERN1_Control_mean = c(m1$mean_ctrl, m2$mean_ctrl),

ERN1_Control_sd = c(m1$sd_ctrl, m2$sd_ctrl),

t_statistic = c(m1$t, m2$t),

p_ttest = c(m1$p, m2$p),

AUC = c(m1$auc, m2$auc),

AUC_CI_low = c(m1$ci_low, m2$ci_low),

AUC_CI_high = c(m1$ci_high, m2$ci_high),

cutoff_youden = c(m1$cutoff, m2$cutoff),

sensitivity = c(m1$sens, m2$sens),

specificity = c(m1$spec, m2$spec),

stringsAsFactors = FALSE

)

write.csv(out, "external_validation_gse38974_gpl4133_results.csv", row.names = FALSE)

write.csv(dat, "external_validation_gse38974_gpl4133_samplelevel.csv", row.names = FALSE)

write.csv(ern1_ann, "external_validation_gse38974_gpl4133_ern1_probes.csv", row.names = FALSE)

summary_txt <- sprintf(

paste0(

"External validation in GSE38974-GPL4133 (N=%d; COPD=%d, Control=%d) used %d ERN1 probes (%s). ",

"Primary probe %s: COPD %.3f +/- %.3f vs Control %.3f +/- %.3f (Welch t=%.3f, p=%.3g), ",

"AUC=%.3f (95%% CI %.3f-%.3f), cutoff %.3f, sensitivity %.1f%%, specificity %.1f%%. ",

"Probe-averaged ERN1 score: COPD %.3f +/- %.3f vs Control %.3f +/- %.3f (Welch t=%.3f, p=%.3g), ",

"AUC=%.3f (95%% CI %.3f-%.3f), cutoff %.3f, sensitivity %.1f%%, specificity %.1f%%. ",

"Sex metadata were partially missing in controls (missing=%d), so sex-adjusted case-control modeling was not performed in this cohort."

),

n_total, n_case, n_ctrl, length(ern1_ids), paste(ern1_ids, collapse = ";"),

primary_probe,

m1$mean_case, m1$sd_case, m1$mean_ctrl, m1$sd_ctrl, m1$t, m1$p,

m1$auc, m1$ci_low, m1$ci_high, m1$cutoff, 100*m1$sens, 100*m1$spec,

m2$mean_case, m2$sd_case, m2$mean_ctrl, m2$sd_ctrl, m2$t, m2$p,

m2$auc, m2$ci_low, m2$ci_high, m2$cutoff, 100*m2$sens, 100*m2$spec,

n_sex_missing

)

writeLines(summary_txt, con = "external_validation_gse38974_gpl4133_summary.txt", useBytes = TRUE)

cat(summary_txt, "\n")

### Code: run_external_validation_gse37768

Purpose: Supplementary validation in GSE37768

Converted from: run_external_validation_gse37768.R

Original extension: .R

Detected encoding: utf-8

options(stringsAsFactors = FALSE)

series_file <- "GSE37768_series_matrix.txt.gz"

annot_file <- "GPL570.annot.gz"

set.seed(20260508)

strip_quotes <- function(x) gsub('^"|"$', "", x)

split_meta <- function(line) {

parts <- strsplit(line, "\t", fixed = TRUE)[[1]]

strip_quotes(parts[-1])

}

all_lines <- readLines(gzfile(series_file), warn = FALSE, encoding = "UTF-8")

get_first_line <- function(prefix) {

idx <- grep(paste0("^", prefix), all_lines)

if (length(idx) == 0) return(NULL)

all_lines[idx[1]]

}

geo_line <- get_first_line("!Sample_geo_accession")

if (is.null(geo_line)) stop("Cannot find !Sample_geo_accession.")

gsm <- split_meta(geo_line)

char_lines <- all_lines[grep("^!Sample_characteristics_ch1", all_lines)]

pheno_line <- char_lines[grepl("phenotype:", char_lines, fixed = TRUE)]

if (length(pheno_line) == 0) stop("Cannot find phenotype line.")

phenotype <- sub("^phenotype:\\s*", "", split_meta(pheno_line[1]), ignore.case = TRUE)

group3 <- ifelse(phenotype %in% c("COPD", "moderate COPD"), "COPD",

ifelse(phenotype == "healthy smoker", "SmokerCtrl",

ifelse(phenotype == "Nonsmoker", "NonsmokerCtrl", NA)))

start_idx <- grep("^!series_matrix_table_begin", all_lines)

end_idx <- grep("^!series_matrix_table_end", all_lines)

if (length(start_idx) == 0 || length(end_idx) == 0) stop("Table boundaries not found.")

expr_text <- paste(all_lines[(start_idx[1] + 1):(end_idx[1] - 1)], collapse = "\n")

expr <- read.delim(

text = expr_text,

header = TRUE,

sep = "\t",

check.names = FALSE,

quote = "\"",

comment.char = ""

)

id_col <- colnames(expr)[1]

expr_ids <- as.character(expr[[id_col]])

# parse annotation

ann_lines <- readLines(gzfile(annot_file), warn = FALSE, encoding = "UTF-8")

a_start <- grep("^!platform_table_begin", ann_lines)

a_end <- grep("^!platform_table_end", ann_lines)

ann <- read.delim(

text = paste(ann_lines[(a_start[1] + 1):(a_end[1] - 1)], collapse = "\n"),

header = TRUE,

sep = "\t",

quote = "",

check.names = FALSE,

comment.char = ""

)

ern_ann <- ann[ann$`Gene symbol` == "ERN1", c("ID", "Gene symbol", "Gene title", "GenBank Accession"), drop = FALSE]

ern_ids <- intersect(as.character(ern_ann$ID), expr_ids)

if (length(ern_ids) == 0) stop("No ERN1 probes found in expression matrix.")

# choose primary probe by NM_001433 if available

primary_probe <- as.character(ern_ann$ID[ern_ann$`GenBank Accession` == "NM_001433"])

primary_probe <- primary_probe[primary_probe %in% ern_ids]

if (length(primary_probe) == 0) primary_probe <- ern_ids[1]

if (length(primary_probe) > 1) primary_probe <- primary_probe[1]

get_probe_vals <- function(pid) {

row <- expr[expr[[id_col]] == pid, , drop = FALSE]

as.numeric(row[1, -1])

}

probe_mat <- sapply(ern_ids, get_probe_vals)

if (!is.matrix(probe_mat)) {

probe_mat <- matrix(probe_mat, ncol = 1)

colnames(probe_mat) <- ern_ids

}

rownames(probe_mat) <- colnames(expr)[-1]

dat <- data.frame(

GSM = gsm,

phenotype = phenotype,

group3 = group3,

ERN1_primary = probe_mat[gsm, primary_probe],

ERN1_mean = rowMeans(probe_mat[gsm, , drop = FALSE], na.rm = TRUE),

stringsAsFactors = FALSE

)

dat <- dat[!is.na(dat$group3), ]

calc_auc <- function(y, score) {

r <- rank(score, ties.method = "average")

n1 <- sum(y == 1)

n0 <- sum(y == 0)

u <- sum(r[y == 1]) - n1 * (n1 + 1) / 2

u / (n1 * n0)

}

calc_metrics <- function(df, score_col, case_group, ctrl_group, n_boot = 2000) {

sub <- df[df$group3 %in% c(case_group, ctrl_group), ]

y <- ifelse(sub$group3 == case_group, 1, 0)

score <- sub[[score_col]]

case_vals <- score[y == 1]

ctrl_vals <- score[y == 0]

tres <- t.test(case_vals, ctrl_vals)

auc <- calc_auc(y, score)

case_idx <- which(y == 1); ctrl_idx <- which(y == 0)

boot_auc <- numeric(n_boot)

for (i in seq_len(n_boot)) {

b_case <- sample(case_idx, length(case_idx), replace = TRUE)

b_ctrl <- sample(ctrl_idx, length(ctrl_idx), replace = TRUE)

b_idx <- c(b_case, b_ctrl)

boot_auc[i] <- calc_auc(y[b_idx], score[b_idx])

}

ci <- as.numeric(quantile(boot_auc, c(0.025, 0.975), na.rm = TRUE))

thresholds <- sort(unique(score))

best_j <- -Inf; best_cut <- NA_real_; best_sens <- NA_real_; best_spec <- NA_real_

for (thr in thresholds) {

pred <- ifelse(score >= thr, 1, 0)

tp <- sum(pred == 1 & y == 1); fn <- sum(pred == 0 & y == 1)

tn <- sum(pred == 0 & y == 0); fp <- sum(pred == 1 & y == 0)

sens <- if ((tp + fn) > 0) tp/(tp + fn) else NA_real_

spec <- if ((tn + fp) > 0) tn/(tn + fp) else NA_real_

j <- sens + spec - 1

if (!is.na(j) && j > best_j) { best_j <- j; best_cut <- thr; best_sens <- sens; best_spec <- spec }

}

data.frame(

comparison = paste0(case_group, "_vs_", ctrl_group),

score = score_col,

n_case = sum(y == 1),

n_ctrl = sum(y == 0),

mean_case = mean(case_vals),

sd_case = sd(case_vals),

mean_ctrl = mean(ctrl_vals),

sd_ctrl = sd(ctrl_vals),

t_stat = unname(tres$statistic),

p_ttest = tres$p.value,

AUC = auc,

AUC_CI_low = ci[1],

AUC_CI_high = ci[2],

cutoff = best_cut,

sensitivity = best_sens,

specificity = best_spec,

stringsAsFactors = FALSE

)

}

res <- rbind(

calc_metrics(dat, "ERN1_primary", "COPD", "SmokerCtrl"),

calc_metrics(dat, "ERN1_mean", "COPD", "SmokerCtrl"),

calc_metrics(dat, "ERN1_primary", "COPD", "NonsmokerCtrl"),

calc_metrics(dat, "ERN1_mean", "COPD", "NonsmokerCtrl")

)

write.csv(res, "external_validation_gse37768_results.csv", row.names = FALSE)

write.csv(dat, "external_validation_gse37768_samplelevel.csv", row.names = FALSE)

write.csv(ern_ann, "external_validation_gse37768_ern1_probes.csv", row.names = FALSE)

summary_txt <- paste0(

"GSE37768 external validation completed. ERN1 probes in matrix: ", paste(ern_ids, collapse = ";"),

"; primary probe: ", primary_probe, ". ",

"Primary comparison (COPD vs healthy smoker controls) results are in external_validation_gse37768_results.csv."

)

writeLines(summary_txt, "external_validation_gse37768_summary.txt", useBytes = TRUE)

cat(summary_txt, "\n")

### Code: run_external_validation_gse76925_nonnorm

Purpose: Supplementary validation in GSE76925 non-normalized matrix

Converted from: run_external_validation_gse76925_nonnorm.R

Original extension: .R

Detected encoding: utf-8

options(stringsAsFactors = FALSE)

series_file <- "GSE76925_series_matrix.txt.gz"

nonnorm_file <- "GSE76925_non-normalized.txt.gz"

probe_id <- "ILMN_1731231" # ERN1

set.seed(20260508)

strip_quotes <- function(x) gsub('^"|"$', "", x)

split_meta <- function(line) {

parts <- strsplit(line, "\t", fixed = TRUE)[[1]]

strip_quotes(parts[-1])

}

series_lines <- readLines(gzfile(series_file), warn = FALSE, encoding = "UTF-8")

get_first_line <- function(lines, prefix) {

idx <- grep(paste0("^", prefix), lines)

if (length(idx) == 0) return(NULL)

lines[idx[1]]

}

gsm_line <- get_first_line(series_lines, "!Sample_geo_accession")

if (is.null(gsm_line)) stop("Cannot find !Sample_geo_accession")

gsm <- split_meta(gsm_line)

char_lines <- series_lines[grep("^!Sample_characteristics_ch1", series_lines)]

extract_char <- function(keyword) {

hit <- char_lines[grepl(keyword, char_lines, fixed = TRUE)]

if (length(hit) == 0) return(rep(NA_character_, length(gsm)))

split_meta(hit[1])

}

copd_raw <- extract_char("copd:")

sex_raw <- extract_char("Sex:")

group <- ifelse(sub("^copd:\\s*", "", copd_raw, ignore.case = TRUE) == "case", "COPD",

ifelse(sub("^copd:\\s*", "", copd_raw, ignore.case = TRUE) == "cont", "Control", NA))

sex <- toupper(sub("^Sex:\\s*", "", sex_raw, ignore.case = TRUE))

sex[!(sex %in% c("M", "F"))] <- NA

# Read non-normalized file header and target row

con <- gzfile(nonnorm_file, open = "rt", encoding = "UTF-8")

header <- readLines(con, n = 1, warn = FALSE)

if (length(header) == 0) stop("Empty non-normalized file.")

cols <- strsplit(header, "\t", fixed = TRUE)[[1]]

target_line <- NULL

repeat {

ln <- readLines(con, n = 1, warn = FALSE)

if (length(ln) == 0) break

if (startsWith(ln, paste0(probe_id, "\t"))) {

target_line <- ln

break

}

}

close(con)

if (is.null(target_line)) stop("ERN1 probe row not found in non-normalized file.")

parts <- strsplit(target_line, "\t", fixed = TRUE)[[1]]

expected_len <- length(cols) + 1L # row includes probe ID in first column

if (length(parts) < expected_len) {

parts <- c(parts, rep("", expected_len - length(parts)))

}

if (length(parts) > expected_len) {

parts <- parts[seq_len(expected_len)]

}

# Extract expression columns and paired detection p-values after first probe ID column

expr_idx <- seq(2, expected_len, by = 2)

pval_idx <- seq(3, expected_len, by = 2)

expr_vals <- suppressWarnings(as.numeric(parts[expr_idx]))

det_pvals <- suppressWarnings(as.numeric(parts[pval_idx]))

# Map sample1..sampleN by order to GSM order from series matrix

n_expr <- length(expr_vals)

if (n_expr != length(gsm)) {

stop(sprintf("Sample count mismatch: expression=%d, GSM=%d", n_expr, length(gsm)))

}

dat <- data.frame(

GSM = gsm,

group = group,

sex = sex,

ERN1_raw = expr_vals,

ERN1_log2 = log2(expr_vals + 1),

detection_p = det_pvals,

stringsAsFactors = FALSE

)

dat <- dat[!is.na(dat$group) & !is.na(dat$ERN1_log2), ]

calc_auc <- function(y, score) {

r <- rank(score, ties.method = "average")

n1 <- sum(y == 1); n0 <- sum(y == 0)

u <- sum(r[y == 1]) - n1 * (n1 + 1) / 2

u / (n1 * n0)

}

y <- ifelse(dat$group == "COPD", 1, 0)

case <- dat$ERN1_log2[y == 1]

ctrl <- dat$ERN1_log2[y == 0]

tres <- t.test(case, ctrl)

auc <- calc_auc(y, dat$ERN1_log2)

boot_auc <- numeric(2000)

case_idx <- which(y == 1); ctrl_idx <- which(y == 0)

for (i in seq_along(boot_auc)) {

b_case <- sample(case_idx, length(case_idx), replace = TRUE)

b_ctrl <- sample(ctrl_idx, length(ctrl_idx), replace = TRUE)

b_idx <- c(b_case, b_ctrl)

boot_auc[i] <- calc_auc(y[b_idx], dat$ERN1_log2[b_idx])

}

auc_ci <- as.numeric(quantile(boot_auc, c(0.025, 0.975), na.rm = TRUE))

thresholds <- sort(unique(dat$ERN1_log2))

best_j <- -Inf; best_cut <- NA_real_; best_sens <- NA_real_; best_spec <- NA_real_

for (thr in thresholds) {

pred <- ifelse(dat$ERN1_log2 >= thr, 1, 0)

tp <- sum(pred == 1 & y == 1); fn <- sum(pred == 0 & y == 1)

tn <- sum(pred == 0 & y == 0); fp <- sum(pred == 1 & y == 0)

sens <- if ((tp + fn) > 0) tp/(tp + fn) else NA_real_

spec <- if ((tn + fp) > 0) tn/(tn + fp) else NA_real_

j <- sens + spec - 1

if (!is.na(j) && j > best_j) { best_j <- j; best_cut <- thr; best_sens <- sens; best_spec <- spec }

}

glm_dat <- dat[!is.na(dat$sex), ]

glm_dat$COPD_bin <- ifelse(glm_dat$group == "COPD", 1, 0)

glm_dat$SexM <- ifelse(glm_dat$sex == "M", 1, 0)

fit <- glm(COPD_bin ~ ERN1_log2 + SexM, data = glm_dat, family = binomial())

co <- summary(fit)$coefficients

beta <- co["ERN1_log2", "Estimate"]

se <- co["ERN1_log2", "Std. Error"]

p_glm <- co["ERN1_log2", "Pr(>|z|)"]

or <- exp(beta); or_l <- exp(beta - 1.96 * se); or_u <- exp(beta + 1.96 * se)

out <- data.frame(

dataset = "GSE76925_non_normalized",

probe_id = probe_id,

n_total = nrow(dat),

n_COPD = sum(dat$group == "COPD"),

n_Control = sum(dat$group == "Control"),

n_male = sum(dat$sex == "M", na.rm = TRUE),

n_female = sum(dat$sex == "F", na.rm = TRUE),

ERN1_log2_COPD_mean = mean(case),

ERN1_log2_COPD_sd = sd(case),

ERN1_log2_Control_mean = mean(ctrl),

ERN1_log2_Control_sd = sd(ctrl),

t_statistic = unname(tres$statistic),

p_ttest = tres$p.value,

AUC = auc,

AUC_CI_low = auc_ci[1],

AUC_CI_high = auc_ci[2],

cutoff_youden = best_cut,

sensitivity = best_sens,

specificity = best_spec,

OR_ERN1_adj_sex = or,

OR_ERN1_adj_sex_low95 = or_l,

OR_ERN1_adj_sex_high95 = or_u,

p_glm_ERN1 = p_glm,

detP_lt_0.05_case = mean(dat$detection_p[dat$group == "COPD"] < 0.05, na.rm = TRUE),

detP_lt_0.05_ctrl = mean(dat$detection_p[dat$group == "Control"] < 0.05, na.rm = TRUE),

stringsAsFactors = FALSE

)

write.csv(out, "external_validation_gse76925_nonnorm_results.csv", row.names = FALSE)

write.csv(dat, "external_validation_gse76925_nonnorm_samplelevel.csv", row.names = FALSE)

summary_txt <- sprintf(

paste0(

"External validation in GSE76925 non-normalized data (N=%d; COPD=%d, Control=%d; Male=%d, Female=%d) using ERN1 probe %s. ",

"Log2 expression: COPD %.3f +/- %.3f vs Control %.3f +/- %.3f (Welch t=%.3f, p=%.3g). ",

"ROC AUC=%.3f (95%% CI %.3f-%.3f), cutoff %.3f, sensitivity %.1f%%, specificity %.1f%%. ",

"Sex-adjusted logistic model: OR=%.3f (95%% CI %.3f-%.3f), p=%.3g. ",

"Detection P<0.05 rate: COPD %.1f%%, Control %.1f%%."

),

nrow(dat), sum(dat$group == "COPD"), sum(dat$group == "Control"), sum(dat$sex == "M", na.rm = TRUE), sum(dat$sex == "F", na.rm = TRUE), probe_id,

mean(case), sd(case), mean(ctrl), sd(ctrl), unname(tres$statistic), tres$p.value,

auc, auc_ci[1], auc_ci[2], best_cut, 100 * best_sens, 100 * best_spec,

or, or_l, or_u, p_glm,

100 * mean(dat$detection_p[dat$group == "COPD"] < 0.05, na.rm = TRUE),

100 * mean(dat$detection_p[dat$group == "Control"] < 0.05, na.rm = TRUE)

)

writeLines(summary_txt, "external_validation_gse76925_nonnorm_summary.txt", useBytes = TRUE)

cat(summary_txt, "\n")

### Code: run_supportive_validation_gse69818_emphysema

Purpose: Supportive analysis in COPD-only emphysema cohort GSE69818

Converted from: run_supportive_validation_gse69818_emphysema.R

Original extension: .R

Detected encoding: utf-8

options(stringsAsFactors = FALSE)

suppressPackageStartupMessages(library(GEOquery))

set.seed(20260508)

g <- getGEO(filename = "GSE69818_series_matrix.txt.gz")

if (is.list(g)) g <- g[[1]]

pd <- pData(g)

fd <- fData(g)

ex <- exprs(g)

if (!("Gene Symbol" %in% colnames(fd))) stop("Gene Symbol not found in fData.")

ern_idx <- which(fd$`Gene Symbol` == "ERN1")

if (length(ern_idx) == 0) stop("ERN1 not found.")

if (length(ern_idx) > 1) {

mu <- rowMeans(ex[ern_idx, , drop = FALSE], na.rm = TRUE)

ern_idx <- ern_idx[which.max(mu)]

}

ern_probe <- rownames(fd)[ern_idx]

ern <- as.numeric(ex[ern_idx, ])

emph <- pd[["emphysema:ch1"]]

gold <- pd[["gold stage:ch1"]]

dat <- data.frame(

GSM = rownames(pd),

emphysema = emph,

gold = gold,

ERN1 = ern,

stringsAsFactors = FALSE

)

dat <- dat[dat$emphysema %in% c("YES", "NO"), ]

yes <- dat$ERN1[dat$emphysema == "YES"]

no <- dat$ERN1[dat$emphysema == "NO"]

tres <- t.test(yes, no)

calc_auc <- function(y, score) {

r <- rank(score, ties.method = "average")

n1 <- sum(y == 1); n0 <- sum(y == 0)

u <- sum(r[y == 1]) - n1 * (n1 + 1) / 2

u / (n1 * n0)

}

y <- ifelse(dat$emphysema == "YES", 1, 0)

auc <- calc_auc(y, dat$ERN1)

boot_auc <- numeric(2000)

yi <- which(y == 1); ni <- which(y == 0)

for (i in seq_along(boot_auc)) {

b1 <- sample(yi, length(yi), replace = TRUE)

b0 <- sample(ni, length(ni), replace = TRUE)

b <- c(b1, b0)

boot_auc[i] <- calc_auc(y[b], dat$ERN1[b])

}

ci <- as.numeric(quantile(boot_auc, c(0.025, 0.975), na.rm = TRUE))

out <- data.frame(

dataset = "GSE69818",

probe = ern_probe,

n_total = nrow(dat),

n_emphysema_yes = sum(dat$emphysema == "YES"),

n_emphysema_no = sum(dat$emphysema == "NO"),

ERN1_yes_mean = mean(yes),

ERN1_yes_sd = sd(yes),

ERN1_no_mean = mean(no),

ERN1_no_sd = sd(no),

t_stat = unname(tres$statistic),

p_ttest = tres$p.value,

AUC_yes_vs_no = auc,

AUC_CI_low = ci[1],

AUC_CI_high = ci[2],

stringsAsFactors = FALSE

)

write.csv(out, "supportive_validation_gse69818_emphysema_results.csv", row.names = FALSE)

write.csv(dat, "supportive_validation_gse69818_emphysema_samplelevel.csv", row.names = FALSE)

summary_txt <- sprintf(

paste0(

"GSE69818 supportive analysis (COPD-only lung tissue; emphysema YES vs NO): N=%d (YES=%d, NO=%d). ",

"ERN1 probe %s: YES %.3f +/- %.3f vs NO %.3f +/- %.3f (Welch t=%.3f, p=%.3g). ",

"AUC=%.3f (95%% CI %.3f-%.3f)."

),

nrow(dat), sum(dat$emphysema == "YES"), sum(dat$emphysema == "NO"),

ern_probe, mean(yes), sd(yes), mean(no), sd(no), unname(tres$statistic), tres$p.value,

auc, ci[1], ci[2]

)

writeLines(summary_txt, "supportive_validation_gse69818_emphysema_summary.txt", useBytes = TRUE)

cat(summary_txt, "\n")

### Code: run_age_adjusted_external_models_20260508

Purpose: Age-/sex-adjusted logistic sensitivity models in external cohorts

Converted from: run_age_adjusted_external_models_20260508.R

Original extension: .R

Detected encoding: utf-8

options(stringsAsFactors = FALSE)

set.seed(20260508)

calc_or_ci <- function(fit, term) {

co <- summary(fit)$coefficients

if (!(term %in% rownames(co))) {

return(c(NA_real_, NA_real_, NA_real_, NA_real_))

}

beta <- co[term, "Estimate"]

se <- co[term, "Std. Error"]

p <- co[term, "Pr(>|z|)"]

or <- exp(beta)

l <- exp(beta - 1.96 * se)

u <- exp(beta + 1.96 * se)

c(or, l, u, p)

}

out_rows <- list()

# -------- GSE47460 --------

g47460 <- read.csv("external_validation_gse47460_samplelevel.csv", check.names = FALSE)

g47460$COPD_bin <- ifelse(g47460$group == "COPD", 1, 0)

g47460$SexM <- ifelse(g47460$sex == "M", 1, ifelse(g47460$sex == "F", 0, NA))

g47460$age_num <- suppressWarnings(as.numeric(g47460$age))

dat47460 <- g47460[complete.cases(g47460[, c("COPD_bin", "ERN1", "SexM", "age_num")]), ]

fit47460 <- glm(COPD_bin ~ ERN1 + age_num + SexM, data = dat47460, family = binomial())

r47460 <- calc_or_ci(fit47460, "ERN1")

out_rows[[length(out_rows) + 1]] <- data.frame(

dataset = "GSE47460",

model = "COPD ~ ERN1 + age + sex",

n = nrow(dat47460),

n_case = sum(dat47460$COPD_bin == 1),

n_ctrl = sum(dat47460$COPD_bin == 0),

ERN1_OR = r47460[1],

ERN1_OR_low95 = r47460[2],

ERN1_OR_high95 = r47460[3],

ERN1_p = r47460[4],

stringsAsFactors = FALSE

)

# -------- GSE76925 non-normalized --------

# Rebuild sample-level with age and sex from series matrix

series_lines <- readLines(gzfile("GSE76925_series_matrix.txt.gz"), warn = FALSE, encoding = "UTF-8")

split_meta <- function(line) {

parts <- strsplit(line, "\t", fixed = TRUE)[[1]]

gsub('^"|"$', "", parts[-1])

}

get_first <- function(prefix) {

idx <- grep(paste0("^", prefix), series_lines)

if (length(idx) == 0) return(NULL)

series_lines[idx[1]]

}

gsm_line <- get_first("!Sample_geo_accession")

gsm <- split_meta(gsm_line)

char_lines <- series_lines[grep("^!Sample_characteristics_ch1", series_lines)]

extract_char <- function(keyword) {

hit <- char_lines[grepl(keyword, char_lines, fixed = TRUE)]

if (length(hit) == 0) return(rep(NA_character_, length(gsm)))

split_meta(hit[1])

}

copd_raw <- extract_char("copd:")

sex_raw <- extract_char("Sex:")

age_raw <- extract_char("age:")

group <- ifelse(sub("^copd:\\s*", "", copd_raw, ignore.case = TRUE) == "case", "COPD",

ifelse(sub("^copd:\\s*", "", copd_raw, ignore.case = TRUE) == "cont", "Control", NA))

sex <- toupper(sub("^Sex:\\s*", "", sex_raw, ignore.case = TRUE))

sex[!(sex %in% c("M", "F"))] <- NA

age <- suppressWarnings(as.numeric(sub("^age:\\s*", "", age_raw, ignore.case = TRUE)))

g76925 <- read.csv("external_validation_gse76925_nonnorm_samplelevel.csv", check.names = FALSE)

g76925$group <- group

g76925$sex <- sex

g76925$age_num <- age

g76925$COPD_bin <- ifelse(g76925$group == "COPD", 1, 0)

g76925$SexM <- ifelse(g76925$sex == "M", 1, ifelse(g76925$sex == "F", 0, NA))

dat76925 <- g76925[complete.cases(g76925[, c("COPD_bin", "ERN1_log2", "SexM", "age_num")]), ]

fit76925 <- glm(COPD_bin ~ ERN1_log2 + age_num + SexM, data = dat76925, family = binomial())

r76925 <- calc_or_ci(fit76925, "ERN1_log2")

out_rows[[length(out_rows) + 1]] <- data.frame(

dataset = "GSE76925_non_normalized",

model = "COPD ~ ERN1_log2 + age + sex",

n = nrow(dat76925),

n_case = sum(dat76925$COPD_bin == 1),

n_ctrl = sum(dat76925$COPD_bin == 0),

ERN1_OR = r76925[1],

ERN1_OR_low95 = r76925[2],

ERN1_OR_high95 = r76925[3],

ERN1_p = r76925[4],

stringsAsFactors = FALSE

)

out <- do.call(rbind, out_rows)

write.csv(out, "external_validation_age_adjusted_models_20260508.csv", row.names = FALSE)

summary_txt <- paste(

sprintf(

"GSE47460 age+sex-adjusted model: OR=%.3f (95%% CI %.3f-%.3f), p=%.3g, n=%d.",

out$ERN1_OR[out$dataset == "GSE47460"],

out$ERN1_OR_low95[out$dataset == "GSE47460"],

out$ERN1_OR_high95[out$dataset == "GSE47460"],

out$ERN1_p[out$dataset == "GSE47460"],

out$n[out$dataset == "GSE47460"]

),

sprintf(

"GSE76925 non-normalized age+sex-adjusted model: OR=%.3f (95%% CI %.3f-%.3f), p=%.3g, n=%d.",

out$ERN1_OR[out$dataset == "GSE76925_non_normalized"],

out$ERN1_OR_low95[out$dataset == "GSE76925_non_normalized"],

out$ERN1_OR_high95[out$dataset == "GSE76925_non_normalized"],

out$ERN1_p[out$dataset == "GSE76925_non_normalized"],

out$n[out$dataset == "GSE76925_non_normalized"]

),

sep = " "

)

writeLines(summary_txt, con = "external_validation_age_adjusted_models_summary_20260508.txt", useBytes = TRUE)

cat(summary_txt, "\n")

Code availability note: the executable script text included above corresponds to the validation and sensitivity analyses reported in the manuscript. GEO accession files and output tables are specified in the main Methods and supplementary tables.
